# 1 The great tit HapMap project: a continental-scale analysis of ge- 2 nomic variation in a songbird

3 Lewis G. Spurgin<sup>1,2\*</sup>, Mirte Bosse<sup>3,4,5</sup>, Frank Adriaensen<sup>6</sup>, Tamer Albayrak<sup>7</sup>, Christos Barboutis<sup>8</sup>, Ed-  
4 uardo Belda<sup>9</sup>, Andrey Bushuev<sup>10</sup>, Jacopo G. Cecere<sup>11</sup>, Anne Charmantier<sup>12</sup>, Mariusz Cichon<sup>13</sup>, Niels J.  
5 Dingemans<sup>14</sup>, Blandine Doligez<sup>15,16</sup>, Tapio Eeva<sup>17</sup>, Kjell Einar Erikstad<sup>18</sup>, Vyacheslav Fedorov<sup>10</sup>, Matteo  
6 Griggio<sup>19</sup>, Dieter Heylen<sup>6,20,21</sup>, Sabine Hille<sup>22</sup>, Camilla A. Hinde<sup>23</sup>, Elena Ivankina<sup>24</sup>, Veronika N. Laine<sup>3,25</sup>,  
7 Bart Kempnaers<sup>26</sup>, Anvar Kerimov<sup>10</sup>, Milos Krist<sup>27</sup>, Laura Kvist<sup>28</sup>, Raivo Mänd<sup>29</sup>, Erik Matthysen<sup>6</sup>, Ruedi  
8 Nager<sup>30</sup>, Boris P. Nikolov<sup>31</sup>, A. Claudia Norte<sup>32</sup>, Markku Orell<sup>28</sup>, Jenny Ouyang<sup>26,33</sup>, Gergana Petrova-  
9 Dinkova<sup>31</sup>, Heinz Richner<sup>34</sup>, Diego Rubolini<sup>35</sup>, Tore Slagsvold<sup>36</sup>, Vallo Tilgar<sup>29</sup>, János Török<sup>37</sup>, Barbara  
10 Tschirren<sup>38</sup>, Csongor I. Vágási<sup>39,40</sup>, Teru Yuta<sup>41</sup>, Martien A.M. Groenen<sup>4</sup>, Marcel E. Visser<sup>3,4,42</sup>, Kees van  
11 Oers<sup>3</sup>, Ben C. Sheldon<sup>2</sup> and Jon Slate<sup>43\*</sup>

- 12 1. School of Biological Sciences, University of East Anglia, Norwich Research Park, United Kingdom
- 13 2. Edward Grey Institute, University of Oxford, United Kingdom
- 14 3. Department of Animal Ecology, Netherlands Institute of Ecology (NIOO-KNAW), Wageningen, the  
15 Netherlands
- 16 4. Animal Breeding and Genomics Centre, Wageningen University, the Netherlands
- 17 5. Department of Ecological Science, Animal Ecology Group, Vrije Universiteit Amsterdam, Amsterdam,  
18 The Netherlands
- 19 6. Evolutionary Ecology Group, Department of Biology, University of Antwerp, Universiteitsplein 1, 2610  
20 Antwerp, Belgium
- 21 7. Department of Biology, Mehmet Akif Ersoy University, Science and Art Faculty, Ortulu, Burdur, Turkey
- 22 8. Hellenic Ornithological Society / BirdLife Greece, Themistokleous 80, GR-10681 Athens
- 23 9. Institut d'Investigació per a la Gestió Integrada de Zones Costaneres, Campus de Gandia, Universitat  
24 Politècnica de València, Carrer Paranimf 1, E-46730 Grau de Gandia (València), Spain
- 25 10. Faculty of Biology, Lomonosov Moscow State University, Moscow 119234, Russia
- 26 11. Area Avifauna Migratrice, Istituto Superiore per la Protezione e la Ricerca Ambientale (ISPRA), via  
27 Ca' Fornacetta 9, I-40064, Ozzano Emilia, (BO), Italy
- 28 12. CEFE-CNRS, UMR 5175, 1919, route de Mende, F34293 Montpellier Cedex 5, France

- 29 13. Institute of Environmental Sciences, Jagiellonian University, Gronostajowa 7, 30-387 Kraków, Poland
- 30 14. Behavioural Ecology, Department of Biology, Ludwig Maximilians University of Munich, Planegg-  
31 Martinsried, Germany
- 32 15. UMR CNRS 5558—LBBE, Biométrie et Biologie Évolutive, UCB Lyon 1 - Bât. Grégor Mendel, 43 bd  
33 du 11 novembre 1918, 69622 VILLEURBANNE cedex, France
- 34 16. Department of Ecology and Evolution, Animal Ecology, Evolutionary Biology Centre, Uppsala University,  
35 Sweden
- 36 17. Department of Biology, University of Turku, Turku 20014, Finland
- 37 18. Norwegian Institute for Nature Research, FRAM-High North Research Centre for Climate and the  
38 Environment, 9296 Tromsø, Norway
- 39 19. Department of Biology, University of Padova, Via U. Bassi 58/B, I-35131, Padova, Italy
- 40 20. Department of Ecology and Evolutionary Biology, Princeton University, Princeton, NJ, United States  
41 of America
- 42 21. Interuniversity Institute for Biostatistics and statistical Bioinformatics, Hasselt University, Diepenbeek,  
43 Belgium
- 44 22. Institute of Wildlife Biology and Game Management, University of Natural Resources and Life Science,  
45 A-1180 Vienna, Austria
- 46 23. Behavioural Ecology Group, Department of Animal Sciences, Wageningen University, Wageningen 6708  
47 PB, The Netherlands
- 48 24. Zvenigorod Biological Station of Lomonosov Moscow State University, P.O. Box Shikhovo, Odintsovo  
49 District, Moscow 143092, Russia
- 50 25. Department of Molecular and Cellular Biology, Harvard University, Cambridge, MA, United States of  
51 America
- 52 26. Max Planck Institute for Ornithology, Department of Behavioural Ecology & Evolutionary Genetics,  
53 Eberhard-Gwinner-Straße, House 5, 82319 Seewiesen (Starnberg), Germany
- 54 27. Department of Zoology and Laboratory of Ornithology, Faculty of Science, Palacký University, Olomouc  
55 77147, Czech Republic
- 56 28. Department of Ecology and Genetics, P.O.Box 3000, 90014-University of Oulu, Finland

- 57 29. Department of Zoology, Institute of Ecology and Earth Sciences, University of Tartu, Vanemuise 46,  
58 Tartu 51014, Estonia
- 59 30. Institute of Biodiversity, Animal Health and Comparative Medicine, University of Glasgow, Glasgow  
60 G12 8QQ, United Kingdom
- 61 31. Bulgarian Ornithological Centre, Institute of Biodiversity and Ecosystem Research, Bulgarian Academy  
62 of Sciences, 1 Tsar Osvoboditel Blvd, 1000 Sofia, Bulgaria
- 63 32. MARE - Marine and Environmental Sciences Centre, Department of Life Sciences, Faculty of Sciences  
64 and Technology, University of Coimbra, Portugal
- 65 33. University of Nevada, Reno, NV, United States of America
- 66 34. Evolutionary Ecology Lab, Institute of Ecology and Evolution, University of Bern, Bern 3012, Switzerland
- 67 35. Dipartimento di Scienze e Politiche Ambientali, Università degli Studi di Milano, via Celoria 26, I-20133,  
68 Milano, Italy
- 69 36. Centre for Ecological and Evolutionary Synthesis (CEES), Department of Biosciences, University of  
70 Oslo, P.O. Box 1066, Blindern, 0316 Oslo, Norway
- 71 37. Behavioural Ecology Group, Department of Systematic Zoology and Ecology, Eötvös Loránd University,  
72 Budapest H-1117, Hungary
- 73 38. University of Exeter, Centre for Ecology and Conservation, Treliever Road, Penryn, TR10 9FE, United  
74 Kingdom
- 75 39. Evolutionary Ecology Group, Hungarian Department of Biology and Ecology, Babeş-Bolyai University,  
76 Cluj-Napoca, Romania
- 77 40. Behavioural Ecology Research Group, Department of Evolutionary Zoology, University of Debrecen,  
78 Debrecen, Hungary
- 79 41. Graduate School of Environmental Science, Hokkaido University, N10 W5 Sapporo, Hokkaido 060-0810,  
80 Japan
- 81 42. Groningen Institute for Evolutionary Life Sciences (GELIFES), University of Groningen, Groningen,  
82 the Netherlands
- 83 43. Department of Animal and Plant Sciences, University of Sheffield, United Kingdom

84 \* **Correspondence:** l.spurgin@uea.ac.uk; j.slate@sheffield.ac.uk

## 85 **Abstract**

86 A major aim of evolutionary biology is to understand why patterns of genomic variation vary among  
87 populations and species. Large-scale genomic studies of widespread species are useful for studying how  
88 the environment and demographic history shape patterns of genomic divergence, and with the continually  
89 decreasing cost of sequencing, such studies are now becoming feasible. Here, we carry out one of the most  
90 comprehensive surveys of genomic variation in a wild vertebrate to date; the great tit (*Parus major*) HapMap  
91 project. We screened *ca* 500,000 SNP markers across 647 individuals from 29 populations, spanning almost  
92 the entire geographic range of the European great tit subspecies. We found that genome-wide variation was  
93 consistent with a recent colonisation across Europe from a single refugium in the Balkans and/or Turkey, with  
94 bottlenecks and reduced genetic diversity in island populations. Differentiation across the genome was highly  
95 heterogeneous, with clear “islands of differentiation” even among populations which are ostensibly panmictic.  
96 These islands of differentiation were consistently found in regions of low recombination, suggesting that  
97 background selection can rapidly promote population differentiation among even the most recently colonised  
98 populations. We also detected genomic outlier regions that were unique to peripheral great tit populations,  
99 most likely as a result of recent directional selection at the range edges of this species. These “unique”  
100 outlier regions contained candidate genes for morphology, thermal adaptation and colouration, supporting  
101 previous research in this species, and providing avenues for future investigation. Our study suggests that  
102 comprehensive screens of genomic variation in wild organisms can provide unique insights into evolution.

## 103 **Author summary**

104 Studying patterns of genetic variation is a useful way of determining why populations and species differ in  
105 nature. Genetic variation is shaped by natural selection, but also by the present and past size of populations,  
106 the amount of migration, and by features of the genome, such as variation in recombination rate, of the  
107 organism being studied. Teasing apart the effects of these different processes on genomic diversity is difficult,  
108 but one way that this can be achieved is by studying genomic variation across the entire range of a species.  
109 We performed a continental-scale analysis of genetic variation in the great tit - a widespread songbird that  
110 has been the focus of extensive ecological research. We first used genomic data to reconstruct the historical  
111 colonisation of great tits across Europe, and showed that during the last ice age, this species was likely  
112 restricted to a single region in Eastern Europe, from which they spread across the continent. We then  
113 studied how patterns of variation differ along the genome, and show that recombination rate is a key driver  
114 of variation among all populations. Importantly, by comparing many populations we were able to identify

115 genes that have been subject to natural selection in specific geographical regions. We found that natural  
116 selection appeared to be strongest in populations on the edges of the great tit's range acting on traits such as  
117 morphology, stress response and colouration. Large-scale genetic analyses such as ours are therefore useful  
118 approaches for understanding how evolution operates in the wild.

## 119 Introduction

120 Since the first studies of allozyme variation in humans [1] and *Drosophila* [2,3], there has been great interest in  
121 explaining how evolutionary and ecological processes shape the patterns of genetic variation observed within  
122 and among natural populations. One focus of research and debate in this area has been on quantifying the roles  
123 of adaptive and neutral processes in explaining observed levels of genetic variation [4]. However, adaptation  
124 does not occur in isolation, but acts on genetic variation that is also shaped by mutation, recombination, gene  
125 flow, and genetic drift. More recently there has been increased effort in understanding how these fundamental  
126 evolutionary forces operate in concert to generate and maintain the levels of genetic diversity commonly  
127 observed in natural populations [5,6].

128 The increasing feasibility of high-throughput sequencing and subsequent characterisation of genome-wide  
129 variation across large numbers of individuals has revealed that at the genetic level, patterns of variation  
130 and divergence among natural populations and species are highly heterogeneous [7]. A key feature of these  
131 “genomic landscapes” of divergence that has received particular attention is the presence of so-called “islands  
132 of differentiation”: outlier regions of the genome with high levels of divergence estimated from statistics  
133 such as  $F_{ST}$  or  $d_{xy}$  [7–10]. Initially these regions were termed “islands of speciation”, and were thought  
134 to arise as a result of reduced gene flow in genomic regions associated with reproductive isolation [7,11].  
135 Subsequent research has revealed that highly heterogeneous patterns of genomic divergence can occur even in  
136 the complete absence of gene flow, as a result of recombination rate variation and linked selection [12,13].  
137 In genomic regions of low recombination, selection for beneficial mutations (positive selection), or against  
138 deleterious mutations (background selection), will impact relatively large genomic regions as a result of high  
139 levels of linkage disequilibrium (LD) among sites. Selection within these regions reduces diversity within  
140 populations, and increases differentiation among them, resulting in “islands” of increased differentiation that  
141 persist over evolutionary time [13,14].

142 Comparing patterns of genomic differentiation among sets of populations or species at different stages of the  
143 divergence/speciation continuum is a powerful way of disentangling the forces that shape variation among  
144 populations. Martin et al. [15] showed that, across multiple *Heliconius* butterfly populations and species,

145 patterns of genomic variation were shaped by a combination of gene flow and selection, particularly in  
146 genomic regions harbouring genes involved in wing patterning. In contrast, Renaut et al. [9] showed that  
147 in *Helianthus* sunflowers, genomic architecture was the main driver of genomic differentiation across sets of  
148 populations. Similarly, recent research in birds has revealed that differentiation landscapes are conserved  
149 across populations, species and even across avian families, with the same islands of differentiation arising  
150 among populations of distantly related species [16–18]. This latter pattern appears to have arisen, at least in  
151 part, as a result of a highly conserved recombination landscape in birds, with background selection in regions  
152 of low recombination producing recurrent islands of differentiation [19].

153 It is now clear that the recombination landscape and linked selection are key drivers of genomic variation within  
154 and among populations. However, we are only just beginning to understand how this linked selection interacts  
155 with other evolutionary forces to shape patterns of differentiation across natural populations and species  
156 [19–23]. A recent, large-scale analysis of threespine sticklebacks (*Gasterosteus aculeatus*) showed that islands  
157 of differentiation were more likely to arise in low recombination regions when gene flow occurred between  
158 populations [24]. There is also a significant impact of divergence time; in recently separated populations the  
159 differentiation landscape is most likely to reflect selective sweeps. Then, as divergence accumulates, genomic  
160 architecture is expected to play an increasingly important role in generating these genomic islands [19].

161 Widespread continental species are excellent models for studying how demography and the environment  
162 shape genetic and phenotypic variation among populations, due to their large effective population sizes and  
163 ecologically varied ranges. Insight into the evolutionary history of such species can be gained if genetic  
164 variation is characterized across much of its geographical range. Cross-population comparisons of genetic  
165 variation can then be used to make inferences about phylogeography, levels of gene flow between populations  
166 and how adaptation to different environmental and ecological conditions occurs. Whole-genome resequencing  
167 and customized SNP genotyping arrays have made studies that characterize all, or much, of the genome  
168 tractable. The first large-scale studies were performed in humans - i.e. the HapMap Projects [25–27] which  
169 characterized human genetic variation on different continents, with a view to determining the feasibility  
170 of association mapping studies. Similar studies have been conducted in domesticated species and their  
171 wild ancestors [28–30], and in model organisms [31,32]. More recently, there is a growing appreciation that  
172 HapMap-type studies are useful for studying signatures of selection and adaptation in natural populations of  
173 species with large effective population sizes and high levels of gene flow [33–36].

174 The European great tit (*Parus major major*) is an excellent model for ecological and evolutionary studies [37].  
175 A wealth of ecological data exists across multiple great tit populations [38–40], enabling informed hypotheses  
176 about selection to be tested in this system. Phylogeographic research using mitochondrial DNA suggests that

177 this species has recently expanded across its European range, possibly from a single refugium in the Balkans  
178 [41]. Contemporary populations are characterised by large effective population sizes and high levels of gene  
179 flow among populations, resulting in low levels of genetic differentiation [42,43]. However, these previous  
180 cross-population molecular studies have relied on a modest number of microsatellite loci and mitochondrial  
181 DNA, making the detection of genomic regions under selection impossible. The genome of the great tit has  
182 recently been sequenced [44], and a high density panel of SNP markers has been developed [45]. A recent  
183 study of two European populations using this marker panel suggests that rapid adaptation has occurred at  
184 the genomic and phenotypic levels, with pronounced selection on morphology [46].

185 Here, we perform a HapMap study of 647 unrelated individuals across 29 populations (Fig. 1), to examine  
186 how genomic architecture, natural selection and population history have shaped patterns of genomic variation  
187 across recently colonised European great tit populations. Using a large SNP panel typed across all individuals,  
188 we first characterise genome-wide patterns of variation within and among populations, in order to infer  
189 population history. We then examine how variation is partitioned across the genome, and test the hypothesis  
190 that highly divergent genomic regions have arisen in genomic regions of low recombination [12,13]. Finally,  
191 we examine how genomic divergence accumulates along the colonisation route of this species, with the aim of  
192 inferring how recent natural selection and background selection drive variation across the genome in the wild.

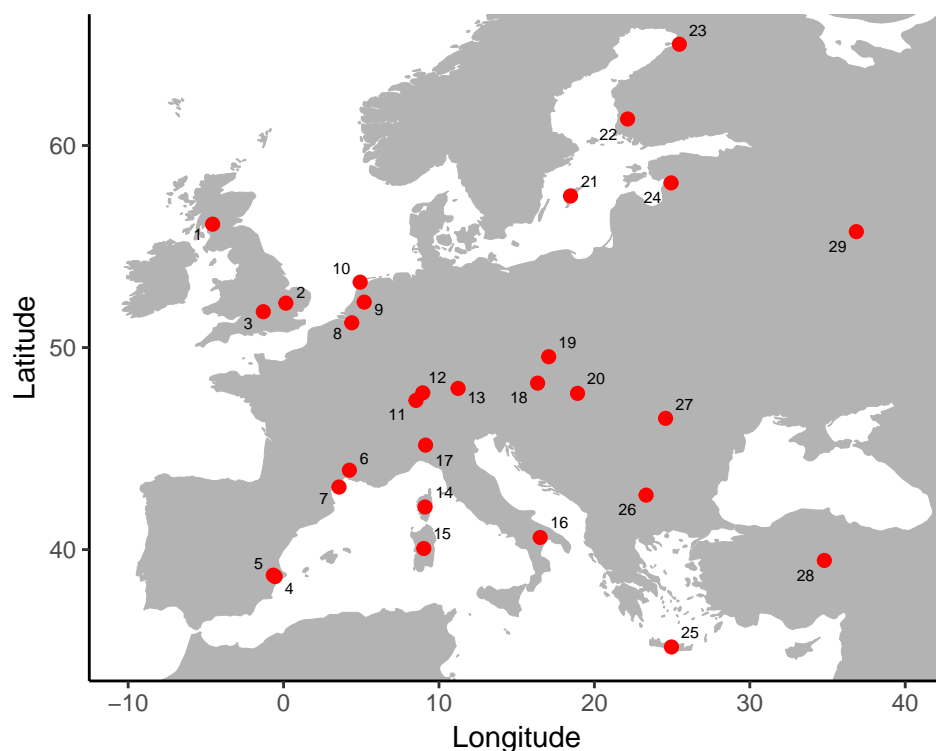

193

194 **Figure 1** Sampling locations of great tit populations. Population names and sample sizes are given in Table  
195 S1, and numbers on the map correspond to the “code” column in Table S1.

## 196 Results and Discussion

### 197 Genetic diversity and population history

198 Sampling locations and sample sizes for each population are given in Table S1. Levels of genetic diversity  
199 ( $\pi_{SNP}$ ) were generally high, but we observed substantial differences among populations (Fig. 2A). Similarly,  
200 LD declined rapidly with genomic distance in all populations, reaching baseline levels within ~5kb in all  
201 populations, but also varying among populations (Fig. S1). Highest levels of LD (and lowest levels of  
202 genetic diversity) were observed in the Mediterranean island populations of Crete (Greece) and Sardinia  
203 (Italy), with lowest levels of LD in central and western Europe (Fig. S1). This is consistent with reduced  
204 effective population size in these island populations, either as result of the colonisation process or more recent  
205 bottlenecks, along with low levels of subsequent gene flow from the continent to the islands [47,48].

206 Genome-wide  $F_{ST}$  between European great tit populations was 0.007, with no significant pattern of isolation-  
207 by-distance (Mantel test;  $r = 0.13$ ,  $p = 0.18$ ; Fig. S2). Instead, the highest levels of  $F_{ST}$  were found in  
208 comparisons involving the Mediterranean island populations of Corsica (France), Sardinia and Crete (Fig.  
209 S2). Admixture analysis was consistent with this pattern (Fig. S3); the  $K = 2$  analysis assigned individuals  
210 in Sardinia and Corsica to one genetic cluster, and the remaining populations to the second. Thus, it is  
211 likely that much of the genetic structure between European great tit populations is a result of genetic drift in  
212 these small island populations. Admixture analysis also revealed some structure between (mainly peripheral)  
213 mainland and larger island populations. At  $K = 3$  (the model that best fitted the great tit data; Fig. S4),  
214 Spain was separated from the rest of mainland Europe. Increasing values of  $K$  resulted in the separation of  
215 populations in Scotland ( $K = 4$ ), Sardinia (from Corsica;  $K = 5$ ), southern France ( $K = 6$ ), Crete ( $K =$   
216 7) and England ( $K = 8$ ). The Admixture output at  $K = 8$  is displayed in Fig. 2C as this gives the most  
217 detailed picture of genetic structure among European great tit populations. Further increases in  $K$  did not  
218 generate patterns of structure that corresponded to geographical variation (Fig. S3), and were increasingly  
219 less well supported (Fig. S4). Thus, even with hundreds of thousands of markers Admixture was unable to  
220 separate many of the European populations, confirming that levels of divergence are extremely low. PCA  
221 largely corroborated the Admixture results, with PC1 separating Corsica and Sardinia from the remaining  
222 populations, PC2 separating Spain, while PC3 and PC4 separated Scotland, England, Corsica, Sardinia and  
223 Crete (Fig. S5).

224 Maximum likelihood analyses implemented in TreeMix showed that a model with no migration explained 97.8%  
225 of variance in relatedness between populations [49]; increasing the number of migration events substantially  
226 improved the percentage of relatedness explained, up to 99.7% when 10 migration events were fitted (Fig.



227 S6). In Figure 3 we display the maximum likelihood tree with two migration events, after which the variance  
228 in relatedness explained plateaued when more migration events were added (Fig. S6). The tree was generally  
229 characterised by short branch lengths, with the exception of the island populations of Sardinia and Crete,  
230 which were grouped with the population from mainland Italy (Fig. 3). Thus, the TreeMix analysis is  
231 consistent with the pattern of low overall genomic divergence, with the exception of the Mediterranean island  
232 populations. However, much (though not all) of the grouping that did occur among continental populations  
233 made geographical sense, with populations from Finland and Estonia grouped together, as were populations  
234 from Turkey and the Balkans, and populations from England and Scotland (Fig. 3). Interestingly, TreeMix  
235 grouped the Spanish and Corsican populations, which is consistent with previous subspecies descriptions of  
236 European great tits [50]. The two fitted migration edges both involved Sardinia, with migration from eastern  
237 Europe to Sardinia, and from Sardinia to Corsica (Fig. 3).

238 We next tested the hypothesis that great tits colonised Europe from a single refugium in Turkey and the  
239 Balkans. This scenario has been suggested before [41], but due to the low number of genetic markers available  
240 there has been limited power with which to test this hypothesis. Using our genome-wide panel of SNP markers,  
241 we compared genetic and geographic distance between each population and the proposed refugial populations.  
242 Because of the elevated structure in Corsica, Sardinia and Crete (Fig. S2), we excluded comparisons involving  
243 these populations. We found that  $F_{ST}$  was significantly related to distance from Turkey ( $r = 0.81$ ,  $p <$   
244  $0.001$ ; Fig. 2B) and the Balkans ( $r = 0.44$ ,  $p = 0.001$ ). The same relationship was not found for alternative  
245 potential refugial populations in Spain ( $r = -0.09$ ,  $p = 0.55$ ), or southern Italy ( $r = 0.04$ ,  $p = 0.77$ ). Our  
246 results therefore lend empirical support to the hypothesis [41] that great tits colonised Europe from a single  
247 refugium in the south-east. Clearly, although our sampling was extensive, it is not exhaustive, and more  
248 fine-scaled sampling in eastern Europe would be required to determine the exact location and extent of  
249 refugial great tit populations. Sampling in North Africa would also be useful to determine whether further  
250 refugia exist, and to quantify the extent of admixture between European and African great tit populations.

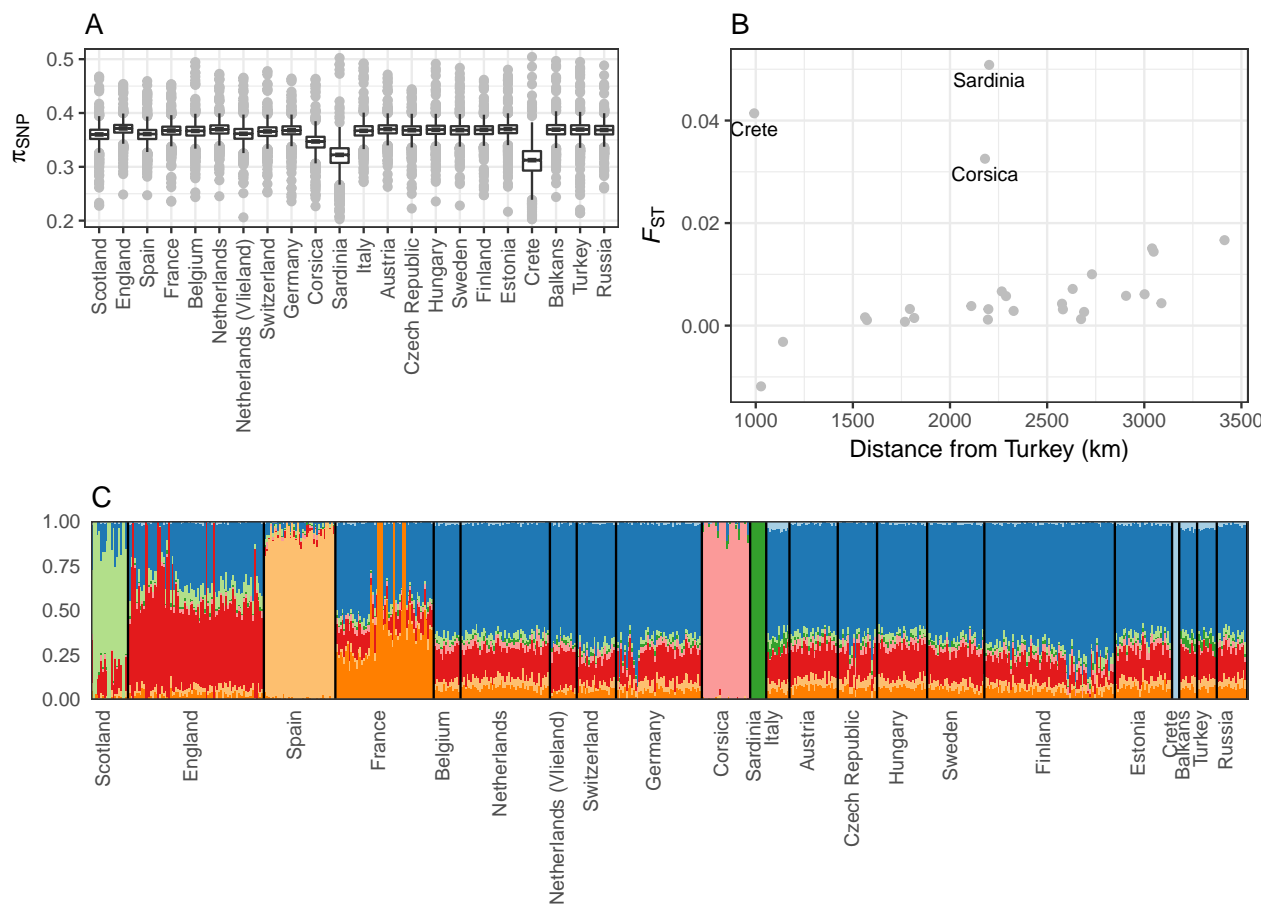

251

252 **Figure 2** Genetic diversity and structure in European Great tit populations. **A** Nucleotide diversity  
 253 within each population. **B** Pairwise  $F_{ST}$  in relation to geographic distance from the Turkey, only including  
 254 comparisons involving Turkey. **C** Output from Admixture analysis at  $K = 8$ . Population details can be  
 255 found in Table S1.

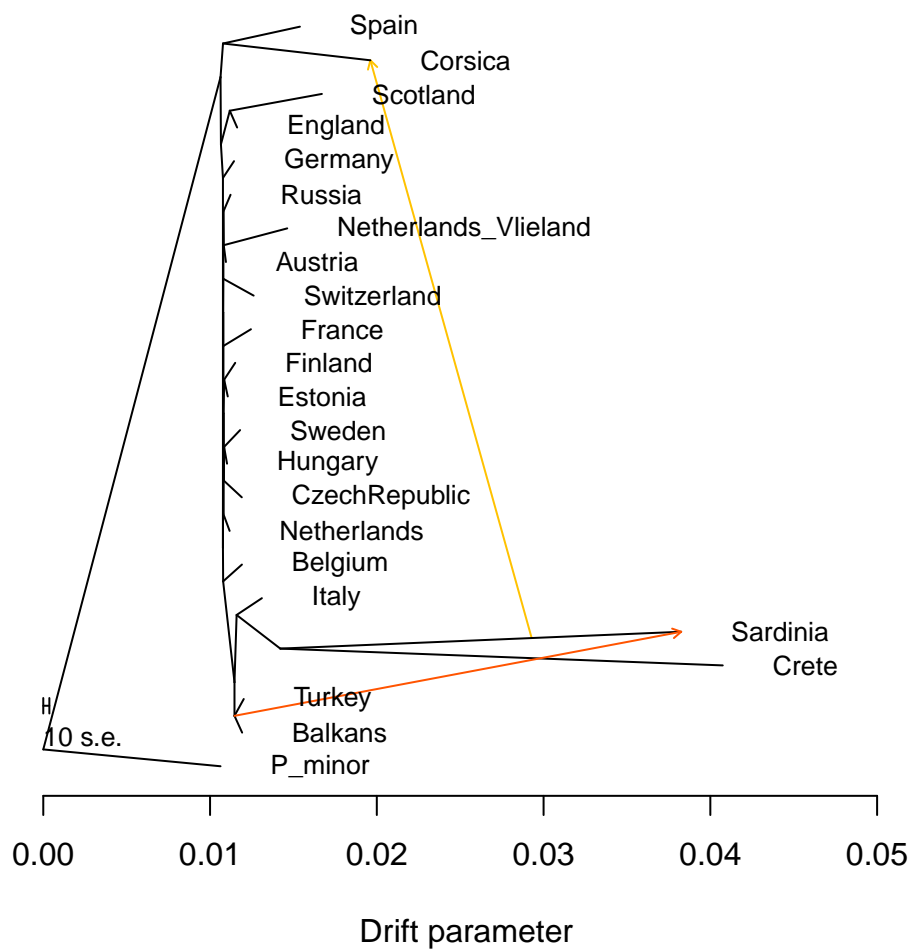

256

257 **Figure 3** Maximum likelihood tree inferred by TreeMix, allowing two migration events. The two migration  
258 events (arrows) are coloured according to their weight (red = higher migration), and horizontal branch lengths  
259 are proportional to the amount of genetic drift that has occurred along the branch. A population of the great  
260 tit's sister species, *Parus minor*, was used as an outgroup. Population details are given in Table S1.

## 261 Genomic landscapes of differentiation

262 It is likely that many, and perhaps the majority, of wild populations are characterised by highly heterogeneous  
263 patterns of differentiation across the genome [23]. To examine how landscapes of genomic divergence have  
264 formed along the colonisation route of European great tits, we calculated windowed  $F_{ST}$  in 500kb bins between  
265 each population and the proposed refugial population in Turkey. We found that  $F_{ST}$  varied markedly across  
266 the genome in all comparisons (Fig. 4; Fig. S7). Outlier regions (windows with standardized  $F_{ST}$ , hereafter  
267  $zF_{ST}$ ,  $> 10$ ) were found in all comparisons apart from Crete and Sardinia, in which overall levels of divergence  
268 were highest (Fig. 4). Our results suggest, therefore, that genomic islands of differentiation can and do arise  
269 even among populations that could be considered panmictic.

270 Genomic differentiation was negatively related to recombination rate in almost all comparisons with Turkey  
271 (Fig. 5). The relationship between  $F_{ST}$  and recombination rate was generally weak, with correlation  
272 coefficients  $< 0.1$ . In a handful of populations this relationship was substantially stronger - most notably  
273 in the island populations of Corsica, Sardinia and Crete, and in England, Scotland, Spain, Finland and  
274 France (Fig. 5). Outlier regions of very high differentiation ( $zF_{ST} > 10$ ) almost exclusively occurred in  
275 relatively low recombining regions, and accordingly, the recombination rate of outlier regions was lower  
276 than the genome-wide average, albeit not significantly (Wilcoxon test,  $P = 0.079$ ). Nonetheless, there is a  
277 suggestion that linked selection in regions of low recombination may play a key role in driving patterns of  
278 genomic differentiation even in the very earliest stages of population separation.

279 Of the 11 outlier regions, nine were found in only one or two comparisons, while the other two were found  
280 in 12 and 10 comparisons, respectively (Table S2). We hereafter refer to outlier regions found in one or  
281 two comparisons as “unique” outlier regions, and to those found in more than two comparisons as “shared”  
282 regions. It appears that European great tits have colonised from a single refugial population, and as such truly  
283 independent comparisons are not available. Therefore an outlier region shared among multiple populations  
284 could represent either selection in the ancestral population, or background selection. Given the pervasiveness  
285 of background selection in birds [17,18], and other organisms [51], and the overall negative relationship  
286 between  $F_{ST}$  and recombination rate in this study (Fig. 5), it is likely that this background selection is the  
287 driver of the shared outlier regions in great tits. Thus, it appears that background selection can generate  
288 islands of differentiation in the very earliest stages of population separation. This is not necessarily what we  
289 would expect - it is often assumed that peaks of high differentiation in recently separated populations are  
290 the product of selective sweeps, and that only after time do correlated patterns of genomic divergence arise  
291 [19,24]. Further research into genomic landscapes of differentiation among widespread continental species  
292 will help us better understand on the role of background selection in shaping genomic divergence over short

293 evolutionary timescales.

294 Regions of high differentiation that are not shared among populations are more likely to be the result  
295 of recent positive selection [19]. We found that unique outlier regions tended to be found in the most  
296 peripheral European great tit populations, with three found in Scotland, two in England, Spain and Finland;  
297 the remaining outlier regions were found in comparisons involving the Czech republic, Russia, Vlieland  
298 (Netherlands) and Belgium (Table S2). Observational and experimental research shows that adaptation at  
299 range edges is a key feature shaping divergence among recently colonised and expanding populations [52–54].  
300 There appeared to be no difference in the recombination rate between shared and unique outlier regions (Fig.  
301 5), although the small number of regions precluded testing this hypothesis formally. Thus, it is likely that  
302 genomic architecture plays a key role in determining how both positive and background selection have shaped  
303 genomic variation across the recent evolutionary history of European great tits.

304 Genes found within shared and unique outlier regions are displayed in Table S2. Perhaps most notable among  
305 these is *COL4A5*, a gene found to be associated with bill length, and under selection between populations in  
306 England and the Netherlands, in a recent great tit study [46]. Here we found that the *COL4A5* region is  
307 an  $F_{ST}$  outlier in England and Scotland, but not in any other European populations (Table S2). UK great  
308 tits have been described as a separate subspecies based on beak shape [55], and our results here, combined  
309 with previous results, suggest that this divergence is the result of recent natural selection in the UK [46].  
310 Another notable candidate gene potentially involved in beak morphology, and previously found to be under  
311 selection in UK great tits is *BMPRI1A*, which plays a key role in palate development [56] and in this study  
312 was found in an outlier region in Scotland. Other candidate morphology and obesity genes in the unique  
313 outlier regions in the UK included *PPP1CB*, which may play a role in adipogenesis [57] and *GHITM*, which  
314 appears to have been subject to natural selection in human pygmy populations [58]. Thus, morphological  
315 traits may frequently be involved in adaptation in great tits.

316 In addition to morphological candidates in the UK, we found outlier regions unique to cold populations in  
317 Scotland, Finland and Russia (Table S2), containing at least one candidate gene for thermal stress (*CDKN1B*)  
318 [59]. Other genomic outlier regions contained potential candidate genes for malaria infection (*MRPL33*) [60]  
319 and colour variation (*SOX10*) [61]. This is thus far an exploratory analysis, and we are therefore reluctant to  
320 speculate whether these candidate genes are genuine targets for natural selection, and more reluctant still to  
321 speculate as to how selection might be driving variation at these regions. Regardless, these candidates will  
322 provide useful starting points for future genomic and ecological investigation.

323 To further explore how selection may have shaped variation in  $F_{ST}$  outlier regions, we estimated levels

324 of nucleotide and haplotype diversity within these regions. Nucleotide diversity ( $\pi_{SNP}$ ) in outlier regions  
325 varied from 0.21 to 0.48, and diversity in these regions was significantly lower than the genome-wide average  
326 (Wilcoxon test,  $P = 0.018$ ; Fig. S8A). However, there appeared to be no difference in nucleotide diversity  
327 between shared and unique regions (Fig. S8A). Haplotype diversity varied substantially among regions, with  
328 haplotype richness ranging from 72 to 1033. Both haplotype richness and marker density in shared regions  
329 tended to be lower than those in unique regions (Fig. S8B). A detailed examination of haplotype structure in  
330 one shared and one unique region is displayed in Figure S9. The unique outlier region (to Finland, situated  
331 on chromosome 1A) was characterised by a complex structure, with a single haplotype at high frequency  
332 in Finland compared to other populations, indicating a population-specific selective sweep (Fig. S9A,C).  
333 In contrast, the shared region on chromosome 2 was much less complex, demonstrating higher haplotype  
334 frequencies across a range of populations. Our data therefore suggest that examining patterns of haplotype  
335 diversity in outlier regions may help to separate recent episodes of positive selection from the gradual process  
336 of background selection (Figs S8, S9).

337 HapMap style projects have been hugely informative in shaping our understanding of how natural selection  
338 operates in humans and other model species [25,32]. This study is one of the largest to date of genomic  
339 variation in a wild vertebrate, which has helped to reveal the evolutionary history of great tits, and to  
340 identify candidate genes and traits that may have been involved in adaptation during and/or after postglacial  
341 recolonisation. Further, this work will form the foundation of many future analyses. Clearly, we have only  
342 touched on haplotype-based methods to infer adaptation here, and this will be the subject of future work.  
343 Environmental association approaches are also highly suited to detecting adaptation in widespread continental  
344 species [62,63], and further work will test how variation in the abiotic environment has shaped patterns of  
345 genomic variation in great tits. This combination of environmental and genomic data in species such as great  
346 tits, in which a wealth of ecological and genomic resources are available, is likely to generate interesting  
347 insights into the the genetic and phenotypic basis of natural selection.

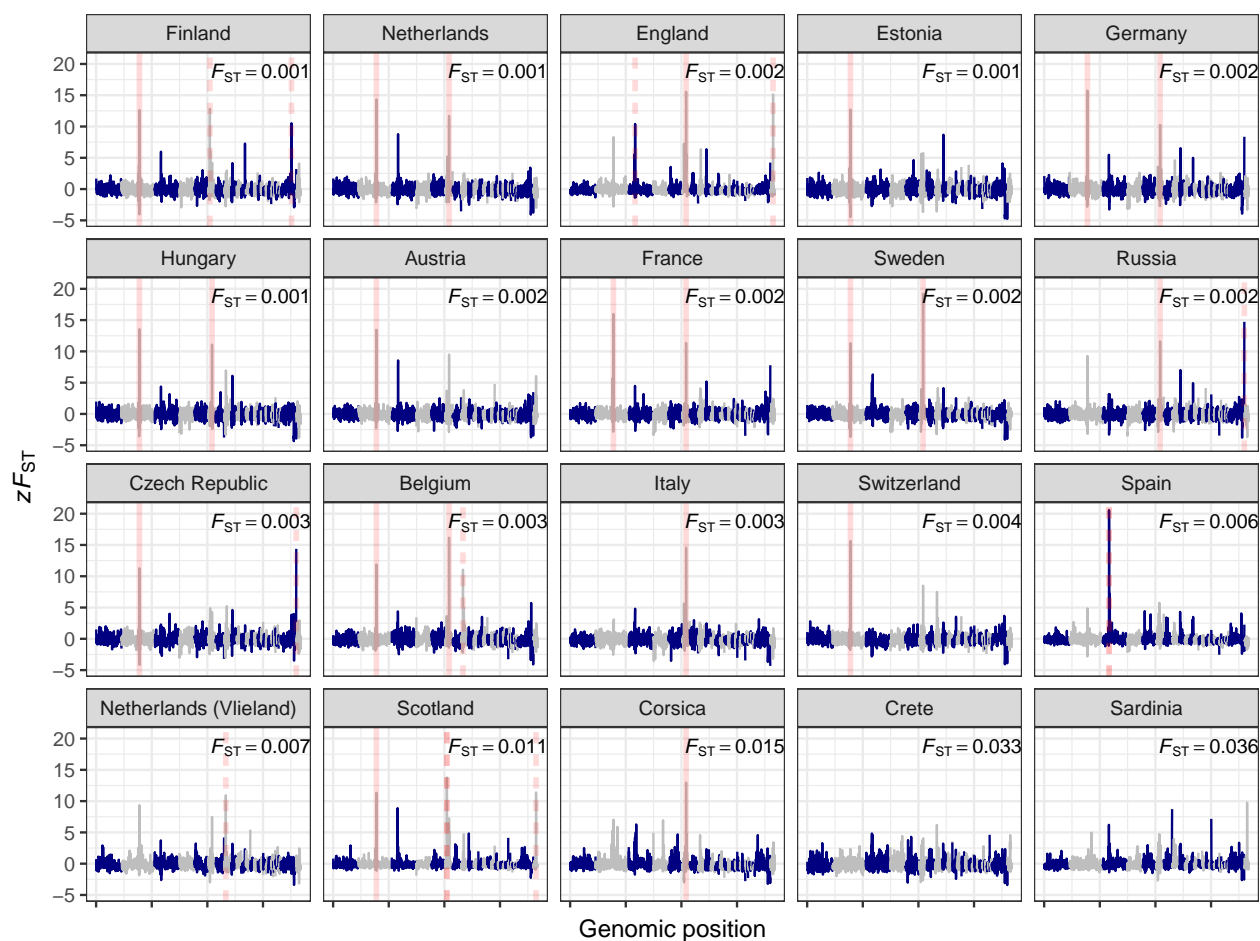

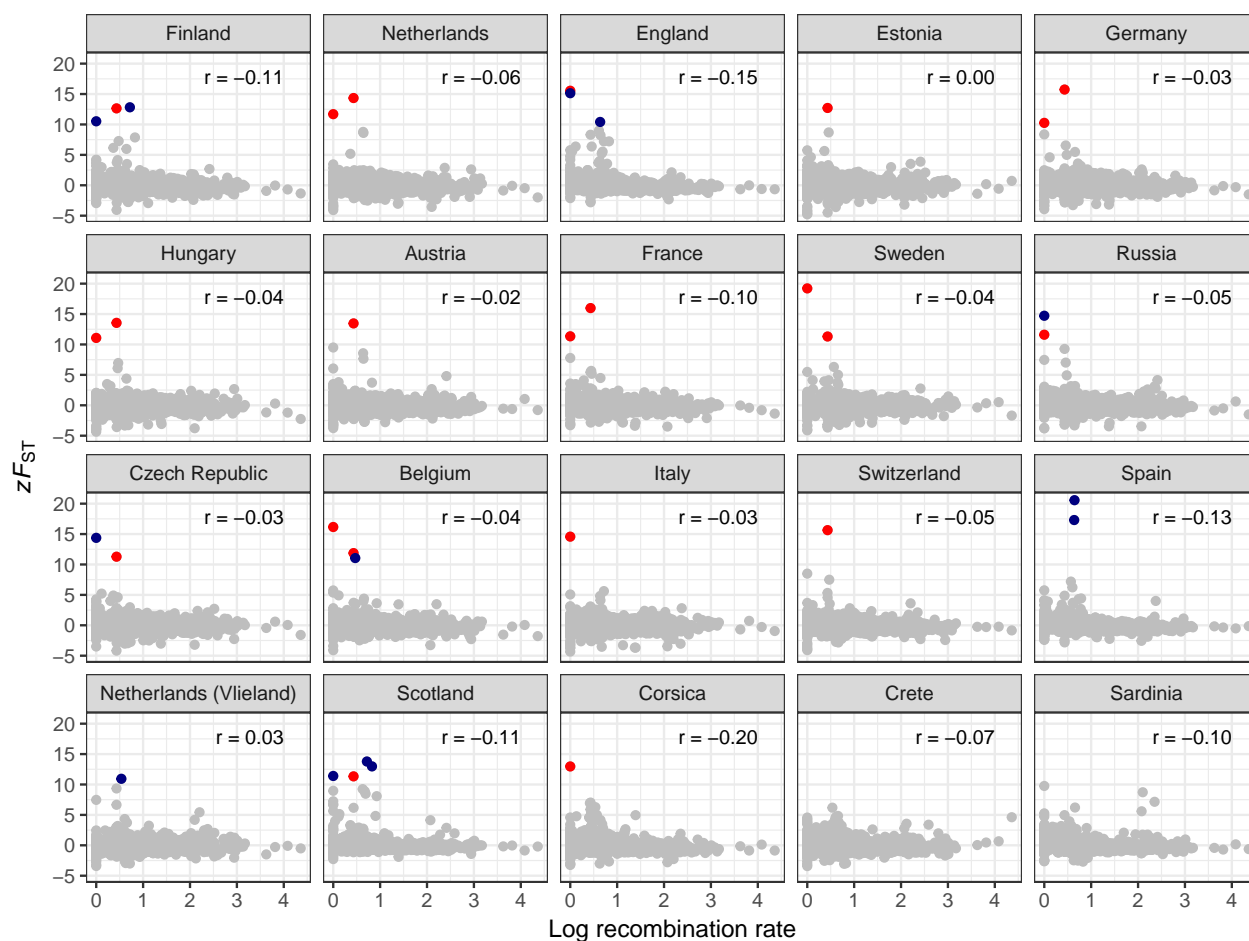

355

356 **Figure 5** Genomic differentiation and recombination rate variation in European great tit populations. Each  
 357 point is the mean of a 500kb window, with each panel displaying a pairwise comparison with the proposed  
 358 refugial population in Turkey. Coloured points represent  $F_{ST}$  outliers (mean standardized  $F_{ST}$  values of  
 359  $zF_{ST} > 10$ ) shared across more than two comparisons (red), or unique to one or two comparisons (dark blue).



## 360 **Materials and Methods**

### 361 **Sampling and molecular methods**

362 Samples were collected from 29 populations from 22 regions across Europe (Fig. 1; Table S1). Samples were  
363 pooled into regions either based on geographical proximity (e.g. Cambridge and Wytham woods), or based  
364 on sample size (e.g. Romania and Bulgaria). An exploratory analysis considering all sampled populations  
365 separately yielded virtually identical results to those shown here, and in no cases did we observe substructure  
366 within pooled populations in our Admixture analyses (Fig. S3).

367 Birds were trapped from nest boxes, or using mist nets, and ringed with a uniquely numbered aluminium  
368 ring. Blood was taken via brachial or tarsal venipuncture, and stored in either 1 ml Cell Lysis Solution  
369 (Gentra Puregene Kit, Qiagen, USA), Queen's buffer, or absolute ethanol. All samples were genotyped using  
370 a custom-made Affymetrix® great tit 650K SNP chip at Edinburgh Genomics (Edinburgh, United Kingdom),  
371 following the approaches outlined in [45], and the filtering approaches outlined in [46]. After filtering, a total  
372 of 647 samples typed at 483888 SNPs were retained for analysis.

### 373 **Analyses**

374 Unless stated otherwise, all population genetic statistics were calculated in PLINK version 1.9 [64], and  
375 downstream analysis and plotting was carried out in R version 3.3 [65]. In each population, we estimated LD  
376 ( $R^2$ ) for each pair of markers within 50kb on the same chromosome, and compared this to physical distance  
377 between marker pairs. We calculated observed heterozygosity for each SNP and population using a reduced  
378 SNP dataset, which was pruned based on LD to remove all markers with  $R^2 > 0.1$ , then thinned with a  
379 probability of retaining each variant of 0.25.

380 We calculated genome-wide (mean)  $F_{ST}$  between each pair of populations using the pruned and thinned  
381 dataset described above. Pairwise  $F_{ST}$  was compared to geographic distance between populations using  
382 Mantel tests, implemented in the Ecodist package in R [66]. We tested whether genetic structure was related  
383 to distance from candidate refugial populations (in the Balkans, Turkey, Spain and Italy), using Pearson  
384 correlations. We also estimated population structure using Admixture version 1.3, with default settings  
385 [67]. We varied values of  $K$  from one to ten; by which point increasing values of  $K$  provided no informative  
386 information about population structure (see results). Model support for each value of  $K$  was estimated by  
387 calculating 5-fold cross-validation error. Finally, we visualised the evolutionary history among European  
388 great tit populations by generating a maximum likelihood tree in TreeMix version 1.13 [49]. We rooted the  
389 tree using a sample of *P. minor* individuals sampled from Amur, Russia. We fitted models allowing for range

390 of migration events (0-10), and used a window size of 500 SNPs [49]. To assess model fit, we calculated the  
391 proportion of variance in relatedness between populations explained by each model [49].

392 We examined the genomic landscape of differentiation across European great tit populations by calculating  
393  $F_{ST}$  in 500kb bins, using python scripts obtained from Github ([https://github.com/simonhmartin/genomics\\_](https://github.com/simonhmartin/genomics_general)  
394 [general](https://github.com/simonhmartin/genomics_general)). We did not estimate  $d_{xy}$ , as this parameter is difficult to estimate accurately from single SNP loci  
395 [13]. We also calculated standardised  $F_{ST}$  ( $zF_{ST}$ ) by mean-centring windowed values and dividing them by  
396 the standard deviation among windows. We defined outlier regions as 500kb bins with  $zF_{ST}$  values greater  
397 than ten. We tested whether the landscape of genomic differentiation was related to recombination rate  
398 variation using a recombination map previously developed for the great tit using a 10K SNP chip [68], from  
399 which we estimated recombination rates using third-order polynomials [69].

## 400 Acknowledgements

401 This work was supported by grants from the European Research Council (grant 202487 to J.S. and grant  
402 339092 – E-Response to MEV) and Natural Environment Research Council (grant NE/J012599/1 to J.S. and  
403 B.C.S). L.G.S was supported by fellowships from the Edward Grey Institute for Ornithology and the BBSRC  
404 (BB/N011759/1). We thank Claire Bloor, Geoff Scopes and Alessandro Davassi of Affymetrix for their help  
405 during the chip design and genotyping calling processes. Richard Talbot and Alison Downing of Edinburgh  
406 Genomics provided the genotyping service.

## 407 References

- 408 1. Harris H. Enzyme polymorphisms in man. Proceedings of the Royal Society B: Biological Sciences.  
409 1966;164: 298–310. doi:10.1098/rspb.1966.0032
- 410 2. Lewontin RC, Hubby JL. A molecular approach to the study of genic heterozygosity in natural pop-  
411 ulations. II. Amount of variation and degree of heterozygosity in natural populations of *Drosophila*  
412 *pseudoobscura*. Genetics. 1966;54: 595–609. doi:10.1111/j.1601-5223.1973.tb01163.x
- 413 3. Hubby JL, Lewontin RC. A molecular approach to the study of genic heterozygosity in natural populations.  
414 I. The number of alleles at different loci in *Drosophila pseudoobscura*. Genetics. 1966;54: 577–594.
- 415 4. Nei M. Selectionism and Neutralism in Molecular Evolution. Molecular Biology and Evolution. 2005;22:  
416 2318–2342. doi:10.1093/molbev/msi242
- 417 5. Feder JL, Egan SP, Nosil P. The genomics of speciation-with-gene-flow. Trends in Genetics. 2012;28:

418 342–350. doi:10.1016/J.TIG.2012.03.009

419 6. Lanfear R, Kokko H, Eyre-Walker A. Population size and the rate of evolution. *Trends in Ecology &*  
420 *Evolution*. 2014;29: 33–41. doi:10.1016/J.TREE.2013.09.009

421 7. Turner TL, Hahn MW, Nuzhdin SV, Mitchison G, Spencer F. Genomic Islands of Speciation in *Anopheles*  
422 *gambiae*. *PLoS Biology*. 2005;3: e285. doi:10.1371/journal.pbio.0030285

423 8. Nadeau NJ, Whibley A, Jones RT, Davey JW, Dasmahapatra KK, Baxter SW, et al. Genomic islands  
424 of divergence in hybridizing *Heliconius* butterflies identified by large-scale targeted sequencing. *Philo-*  
425 *sophical Transactions of the Royal Society of London B: Biological Sciences*. 2011;367. Available: doi:  
426 10.1098/rstb.2011.0198

427 9. Renaut S, Grassa CJ, Yeaman S, Moyers BT, Lai Z, Kane NC, et al. Genomic islands of diver-  
428 gence are not affected by geography of speciation in sunflowers. *Nature Communications*. 2013;4: 1827.  
429 doi:10.1038/ncomms2833

430 10. Poelstra JW, Vijay N, Bossu CM, Lantz H, Ryll B, Muller I, et al. The genomic landscape underlying phe-  
431 notypic integrity in the face of gene flow in crows. *Science*. 2014;344: 1410–1414. doi:10.1126/science.1253226

432 11. Wolf JBW, Ellegren H. Making sense of genomic islands of differentiation in light of speciation. *Nature*  
433 *Reviews Genetics*. 2017;18: 87–100. doi:10.1038/nrg.2016.133

434 12. Noor MAF, Bennett SM. Islands of speciation or mirages in the desert? Examining the role of restricted  
435 recombination in maintaining species. *Heredity*. 2009;103: 439–444. doi:10.1038/hdy.2009.151

436 13. Cruickshank TE, Hahn MW. Reanalysis suggests that genomic islands of speciation are due to reduced  
437 diversity, not reduced gene flow. *Molecular Ecology*. 2014;23: 3133–3157. doi:10.1111/mec.12796

438 14. Turner TL, Hahn MW. Genomic islands of speciation or genomic islands and speciation? *Molecular*  
439 *Ecology*. 2010;19: 848–850. doi:10.1111/j.1365-294X.2010.04532.x

440 15. Martin SH, Dasmahapatra KK, Nadeau NJ, Salazar C, Walters JR, Simpson F, et al. Genome-wide  
441 evidence for speciation with gene flow in *Heliconius* butterflies. *Genome Research*. 2013;23: 1817–1828.  
442 doi:10.1101/gr.159426.113

443 16. Burri R, Nater A, Kawakami T, Mugal CF, Olason PI, Smeds L, et al. Linked selection and recombination  
444 rate variation drive the evolution of the genomic landscape of differentiation across the speciation continuum  
445 of *Ficedula* flycatchers. *Genome research*. 2015;25: 1656–1665. doi:10.1101/gr.196485.115

446 17. Vijay N, Weissensteiner M, Burri R, Kawakami T, Ellegren H, Wolf JBW. Genomewide patterns of

- 447 variation in genetic diversity are shared among populations, species and higher-order taxa. *Molecular Ecology*.  
448 2017;26: 4284–4295. doi:10.1111/mec.14195
- 449 18. Van Doren BM, Campagna L, Helm B, Illera JC, Lovette IJ, Liedvogel M. Correlated patterns of  
450 genetic diversity and differentiation across an avian family. *Molecular Ecology*. 2017;26: 3982–3997.  
451 doi:10.1111/mec.14083
- 452 19. Burri R. Dissecting differentiation landscapes: a linked selection’s perspective. *Journal of Evolutionary*  
453 *Biology*. 2017;30: 1501–1505. doi:10.1111/jeb.13108
- 454 20. Ellegren H, Wolf JBW. Parallelism in genomic landscapes of differentiation, conserved genomic features  
455 and the role of linked selection. *Journal of Evolutionary Biology*. 2017;30: 1516–1518. doi:10.1111/jeb.13113
- 456 21. Jiggins CD, Martin SH. Glittering gold and the quest for Isla de Muerta. *Journal of Evolutionary Biology*.  
457 2017;30: 1509–1511. doi:10.1111/jeb.13110
- 458 22. Lohse K. Come on feel the noise - from metaphors to null models. *Journal of Evolutionary Biology*.  
459 2017;30: 1506–1508. doi:10.1111/jeb.13109
- 460 23. Ravinet M, Faria R, Butlin RK, Galindo J, Bierne N, Rafajlović M, et al. Interpreting the genomic  
461 landscape of speciation: a road map for finding barriers to gene flow. *Journal of Evolutionary Biology*.  
462 2017;30: 1450–1477. doi:10.1111/jeb.13047
- 463 24. Samuk K, Owens GL, Delmore KE, Miller SE, Rennison DJ, Schluter D. Gene flow and selection interact  
464 to promote adaptive divergence in regions of low recombination. *Molecular Ecology*. 2017;26: 4378–4390.  
465 doi:10.1111/mec.14226
- 466 25. Altshuler D, Donnelly P. A haplotype map of the human genome. *Nature*. 2005;437: 1299–1320.  
467 doi:10.1038/nature04226
- 468 26. Frazer KA, Ballinger DG, Cox DR, Hinds DA, Stuve LL, Gibbs RA, et al. A second generation human  
469 haplotype map of over 3.1 million SNPs. *Nature*. 2007;449: 851–861. doi:10.1038/nature06258
- 470 27. Altshuler DM, Gibbs RA, Peltonen L, Altshuler DM, Gibbs RA, Peltonen L, et al. Integrating common  
471 and rare genetic variation in diverse human populations. *Nature*. 2010;467: 52–8. doi:10.1038/nature09298
- 472 28. Kijas JW, Lenstra JA, Hayes B, Boitard S, Porto Neto LR, San Cristobal M, et al. Genome-wide analysis  
473 of the world’s sheep breeds reveals high levels of historic mixture and strong recent selection. *PLoS Biology*.  
474 2012;10: e1001258. doi:10.1371/journal.pbio.1001258
- 475 29. Gibbs RA, Taylor JF, Van Tassell CP, Barendse W, Eversole KA, Gill CA, et al. Genome-wide

- 476 survey of SNP variation uncovers the genetic structure of cattle breeds. *Science*. 2009;324: 528–532.  
477 doi:10.1126/science.1167936
- 478 30. Chia J-M, Song C, Bradbury PJ, Costich D, Leon N de, Doebley J, et al. Maize HapMap2 identifies  
479 extant variation from a genome in flux. *Nature Genetics*. 2012;44: 803–807. doi:10.1038/ng.2313
- 480 31. Lindblad-Toh K, Wade CM, Mikkelsen TS, Karlsson EK, Jaffe DB, Kamal M, et al. Genome se-  
481 quence, comparative analysis and haplotype structure of the domestic dog. *Nature*. 2005;438: 803–819.  
482 doi:10.1038/nature04338
- 483 32. Kirby A, Kang HM, Wade CM, Cotsapas C, Kostem E, Han B, et al. Fine mapping in 94 inbred mouse  
484 strains using a high-density haplotype resource. *Genetics*. 2010;185: 1081–95. doi:10.1534/genetics.110.115014
- 485 33. Horton MW, Hancock AM, Huang YS, Toomajian C, Atwell S, Auton A, et al. Genome-wide patterns of  
486 genetic variation in worldwide *Arabidopsis thaliana* accessions from the RegMap panel. *Nature Genetics*.  
487 2012;44: 212–216. doi:10.1038/ng.1042
- 488 34. Alonso-Blanco C, Andrade J, Becker C, Bemm F, Bergelson J, Borgwardt KM, et al. 1,135  
489 Genomes Reveal the Global Pattern of Polymorphism in *Arabidopsis thaliana*. *Cell*. 2016;166: 481–491.  
490 doi:10.1016/j.cell.2016.05.063
- 491 35. Williamson RJ, Josephs EB, Platts AE, Hazzouri KM, Haudry A, Blanchette M, et al. Evidence for  
492 widespread positive and negative selection in coding and conserved noncoding regions of *Capsella grandiflora*.  
493 *PLoS Genetics*. 2014;10: e1004622. doi:10.1371/journal.pgen.1004622
- 494 36. Mueller JC, Kuhl H, Boerno S, Tella JL, Carrete M, Kempenaers B. Evolution of genomic variation in  
495 the burrowing owl in response to recent colonization of urban areas. *Proceedings of the Royal Society B:*  
496 *Biological Sciences*. The Royal Society; 2018;285: 20180206. doi:10.1098/rspb.2018.0206
- 497 37. Gosler A. The great tit. *Hamlyn Species Guides*; 1993.
- 498 38. Visser ME, Noordwijk AJv, Tinbergen JM, Lessells CM. Warmer springs lead to mistimed reproduction  
499 in great tits (*Parus major*). *Proceedings of the Royal Society B: Biological Sciences*. 1998;265: 1867–1870.  
500 doi:10.1098/rspb.1998.0514
- 501 39. Charmantier A, McCleery RH, Cole LR, Perrins C, Kruuk LEB, Sheldon BC. Adaptive pheno-  
502 typic plasticity in response to climate change in a wild bird population. *Science*. 2008;320: 800–803.  
503 doi:10.1126/science.1157174
- 504 40. Dingemans NJ, Bouwman KM, Pol M van de, Overveld T van, Patrick SC, Matthysen E, et al. Variation

- 505 in personality and behavioural plasticity across four populations of the great tit *Parus major*. *Journal of*  
506 *Animal Ecology*. 2012;81: 116–126. doi:10.1111/j.1365-2656.2011.01877.x
- 507 41. Kvist L, Ruokonen M, Lumme J, Orell M. The colonization history and present-day population structure  
508 of the European great tit (*Parus major major*). *Heredity*. 1999;82: 495–502. doi:10.1038/sj.hdy.6885130
- 509 42. Kvist L, Martens J, Higuchi H, Nazarenko AA, Valchuk OP, Orell M. Evolution and genetic structure  
510 of the great tit (*Parus major*) complex. *Proceedings of the Royal Society B: Biological Sciences*. 2003;270:  
511 1447–1454. doi:10.1098/rspb.2002.2321
- 512 43. Lemoine M, Lucek K, Perrier C, Saladin V, Adriaensen F, Barba E, et al. Low but contrasting neutral  
513 genetic differentiation shaped by winter temperature in European great tits. *Biological Journal of the Linnean*  
514 *Society*. 2016;118: 668–685. doi:10.1111/bij.12745
- 515 44. Laine V, Gossmann T, Schachtschneider K, Garroway C, Madsen O, Verhoeven K, et al. Evolutionary  
516 signals of selection on cognition from the great tit genome and methylome. *Nature Communications*. 2016;7:  
517 10474. doi:10.1038/ncomms10474
- 518 45. Kim J-M, Santure AW, Barton HJ, Quinn JL, Cole EF, Great Tit HapMap Consortium ME, et  
519 al. A high-density SNP chip for genotyping great tit (*Parus major*) populations and its application to  
520 studying the genetic architecture of exploration behaviour. *Molecular Ecology Resources*. 2018;18: 877–891.  
521 doi:10.1111/1755-0998.12778
- 522 46. Bosse M, Spurgin L, Laine V, Cole E, Firth J, Gienapp P, et al. Recent natural selection causes adaptive  
523 evolution of an avian polygenic trait. *Science*. 2017;358: 365–368. doi:10.1126/science.aal3298
- 524 47. Postma E, Noordwijk AJ van. Gene flow maintains a large genetic difference in clutch size at a small  
525 spatial scale. *Nature*. 2005;433: 65–68. doi:10.1038/nature03083
- 526 48. James JE, Lanfear R, Eyre-Walker A. Molecular Evolutionary Consequences of Island Colonization.  
527 *Genome Biology and Evolution*. 2016;8: 1876–1888. doi:10.1093/gbe/evw120
- 528 49. Pickrell JK, Pritchard JK. Inference of Population Splits and Mixtures from Genome-Wide Allele  
529 Frequency Data. *PLoS Genetics*. 2012;8: e1002967. doi:10.1371/journal.pgen.1002967
- 530 50. Clements J. *The Clements checklist of the birds of the world*. New York: Cornell University Press; 2007.
- 531 51. Comeron JM. Background selection as null hypothesis in population genomics: insights and challenges  
532 from *Drosophila* studies. *Philosophical Transactions of the Royal Society B: Biological sciences*. The Royal

- 533 Society; 2017;372. doi:10.1098/rstb.2016.0471
- 534 52. Sexton JP, McIntyre PJ, Angert AL, Rice KJ. Evolution and Ecology of Species Range Limits. Annual  
535 Review of Ecology, Evolution, and Systematics. 2009;40: 415–436. doi:10.1146/annurev.ecolsys.110308.120317
- 536 53. Hill JK, Griffiths HM, Thomas CD. Climate Change and Evolutionary Adaptations at Species' Range  
537 Margins. Annual Review of Entomology. 2011;56: 143–159. doi:10.1146/annurev-ento-120709-144746
- 538 54. Weiss-Lehman C, Hufbauer RA, Melbourne BA. Rapid trait evolution drives increased speed and variance  
539 in experimental range expansions. Nature Communications. 2017;8: 14303. doi:10.1038/ncomms14303
- 540 55. Gosler AG. A comment on the validity of the British Great Tit *Parus major newtoni*. Bulletin of The  
541 British Ornithologists' Club. 1999;119: 47–55. Available: <http://biostor.org/reference/111964>
- 542 56. Baek J-A, Lan Y, Liu H, Maltby KM, Mishina Y, Jiang R. *Bmpr1a* signaling plays critical  
543 roles in palatal shelf growth and palatal bone formation. Developmental Biology. 2011;350: 520–531.  
544 doi:10.1016/J.YDBIO.2010.12.028
- 545 57. Cho Y-L, Min J-K, Roh KM, Kim WK, Han BS, Bae K-H, et al. Phosphoprotein phosphatase 1CB  
546 (PPP1CB), a novel adipogenic activator, promotes 3T3-L1 adipogenesis. Biochemical and Biophysical  
547 Research Communications. 2015;467: 211–217. doi:10.1016/J.BBRC.2015.10.004
- 548 58. Migliano AB, Romero IG, Metspalu M, Leavesley M, Pagani L, Antao T, et al. Evolution of the Pygmy  
549 Phenotype: Evidence of Positive Selection from Genome-wide Scans in African, Asian, and Melanesian  
550 Pygmies. Human Biology. 2013;85: 251–284. doi:10.3378/027.085.0313
- 551 59. Logan CA, Somero GN. Effects of thermal acclimation on transcriptional responses to acute heat stress in  
552 the eurythermal fish *Gillichthys mirabilis* (Cooper). American Journal of Physiology-Regulatory, Integrative  
553 and Comparative Physiology. 2011;300: R1373–R1383. doi:10.1152/ajpregu.00689.2010
- 554 60. Videvall E, Cornwallis CK, Palinauskas V, Valkiūnas G, Hellgren O. The Avian Transcriptome Response  
555 to Malaria Infection. Molecular Biology and Evolution. 2015;32: 1255–1267. doi:10.1093/molbev/msv016
- 556 61. Gunnarsson U, Kerje S, Bed'hom B, Sahlqvist A-S, Ekwall O, Tixier-Boichard M, et al. The Dark brown  
557 plumage color in chickens is caused by an 8.3-kb deletion upstream of *SOX10*. Pigment Cell & Melanoma  
558 Research. 2011;24: 268–274. doi:10.1111/j.1755-148X.2011.00825.x
- 559 62. Coop G, Witonsky D, Di Rienzo A, Pritchard JK. Using environmental correlations to identify loci  
560 underlying local adaptation. Genetics. 2010;185: 1411–23. doi:10.1534/genetics.110.114819
- 561 63. Frichot E, Schoville SD, Bouchard G, François O. Testing for associations between loci and environmental

- 562 gradients using latent factor mixed models. *Molecular Biology and Evolution*. Oxford University Press;  
563 2013;30: 1687–1699. doi:10.1093/molbev/mst063
- 564 64. Purcell S, Neale B, Todd-Brown K, Thomas L, Ferreira MA, Bender D, et al. PLINK: A Tool Set  
565 for Whole-Genome Association and Population-Based Linkage Analyses. *The American Journal of Human*  
566 *Genetics*. 2007;81: 559–575. doi:10.1086/519795
- 567 65. R Development Core Team. R: A Language and Environment for Statistical Computing [Internet]. Team  
568 RDC, editor. 2011. doi:10.1007/978-3-540-74686-7
- 569 66. Goslee SC, Urban DL. The ecodist Package for Dissimilarity-based Analysis of Ecological Data. *Journal*  
570 *of Statistical Software*. 2007;22: 1–19. doi:10.18637/jss.v022.i07
- 571 67. Alexander DH, Novembre J, Lange K. Fast model-based estimation of ancestry in unrelated individuals.  
572 *Genome Research*. 2009;19: 1655–1664. doi:10.1101/gr.094052.109
- 573 68. Oers K van, Santure AW, De Cauwer I, Bers NE van, Crooijmans RP, Sheldon BC, et al. Replicated  
574 high-density genetic maps of two great tit populations reveal fine-scale genomic departures from sex-equal  
575 recombination rates. *Heredity*. 2014;112: 307–316. doi:10.1038/hdy.2013.107
- 576 69. Corcoran P, Gossman TI, Barton HJ, Great Tit HapMap Consortium, Slate J, Zeng K. Determinants of  
577 the Efficacy of Natural Selection on Coding and Noncoding Variability in Two Passerine Species. *Genome*  
578 *Biology and Evolution*. 2017;9: 2987–3007. doi:10.1093/gbe/evx213
