# Supplementary material for: The great tit HapMap project: a continental-scale analysis of genomic variation in a songbird
Source: bioRxiv or medRxiv preprint supplement (doi:10.1101/561399), 2020-12-09
Supplement: Supplementary file [file media-1.pdf]

1 **Supplementary material for “The great tit HapMap project: a**  
2 **continental-scale analysis of genomic variation in a songbird”**

3 **Table S1** Sampling details for the 29 European great tit populations. “Code” corresponds to labels in Figure  
4 1 of the main text.

| Code | Population                 | Region                 | N  | Latitude | Longitude |
|------|----------------------------|------------------------|----|----------|-----------|
| 1    | Loch_Lomond_Scotland       | Scotland               | 21 | 56.108   | -4.562    |
| 2    | Cambridge_UK               | England                | 28 | 52.198   | 0.152     |
| 3    | Wytham_UK                  | England                | 48 | 51.776   | -1.303    |
| 4    | Font_Roja_Spain            | Spain                  | 19 | 38.664   | -0.544    |
| 5    | Mariola_Spain              | Spain                  | 21 | 38.737   | -0.658    |
| 6    | La_Rouviere_France         | France                 | 19 | 43.930   | 4.235     |
| 7    | Montpellier_France         | France                 | 36 | 43.098   | 3.569     |
| 8    | Antwerp_Belgium            | Belgium                | 15 | 51.226   | 4.390     |
| 9    | Westerheide                | Netherlands            | 50 | 52.250   | 5.190     |
| 10   | Vlieland_NL                | Netherlands (Vlieland) | 15 | 53.238   | 4.932     |
| 11   | Zurich_Switzerland         | Switzerland            | 22 | 47.383   | 8.523     |
| 12   | Radolfzell_Germany         | Germany                | 18 | 47.759   | 8.957     |
| 13   | Seewisen_Germany           | Germany                | 30 | 47.978   | 11.233    |
| 14   | Pirio_Muro_Corsica         | Corsica                | 27 | 42.110   | 9.104     |
| 15   | Sardinia                   | Sardinia               | 9  | 40.056   | 9.025     |
| 16   | Matera_Italy               | Italy                  | 5  | 40.601   | 16.514    |
| 17   | Po_Plain_Italy             | Italy                  | 8  | 45.171   | 9.138     |
| 18   | Vienna_Austria             | Austria                | 27 | 48.239   | 16.347    |
| 19   | Velky_Kosir_Czech_Republic | Czech Republic         | 22 | 49.547   | 17.062    |
| 20   | Pilis_Mountains_Hungary    | Hungary                | 28 | 47.733   | 18.917    |
| 21   | Gotland_Sweden             | Sweden                 | 32 | 57.504   | 18.466    |
| 22   | Harjavalta_Finland         | Finland                | 44 | 61.314   | 22.139    |
| 23   | Oulu_Finland               | Finland                | 29 | 65.013   | 25.468    |
| 24   | Kilingi-Nõmme_Estonia      | Estonia                | 32 | 58.150   | 24.938    |
| 25   | Crete                      | Crete                  | 4  | 35.183   | 24.960    |
| 26   | Bulgaria                   | Balkans                | 3  | 42.696   | 23.328    |
| 27   | Romania                    | Balkans                | 7  | 46.497   | 24.582    |
| 28   | Turkey                     | Turkey                 | 11 | 39.464   | 34.797    |
| 29   | Zvenigorod_Russia          | Russia                 | 17 | 55.738   | 36.857    |

5 **Table S2** Details of outlier  $F_{ST}$  regions in European great tit populations. For each region,  $F_{ST}$  was calculated for each population versus Turkey.  
6 The “number of outliers” represents the number of *populations* in which each region was detected as an outlier. All genes found within 500kb outlier  
7 windows are displayed.

| Chromosome | Position (MB) | Number of outliers | Outlier comparisons                                                                                                        | Genes                                                                                                                                                                                               |
|------------|---------------|--------------------|----------------------------------------------------------------------------------------------------------------------------|-----------------------------------------------------------------------------------------------------------------------------------------------------------------------------------------------------|
| 2          | 81.5          | 12                 | Austria, Belgium, Czech Republic, Estonia, Finland, France<br>Germany, Hungary, Netherlands, Scotland, Sweden, Switzerland | PADP7, SRDSA1, NSUN2, UBE2QL, MED10                                                                                                                                                                 |
| 6          | 18            | 10                 | Belgium, Corsica, England, France, Germany, Hungary, Italy<br>Netherlands, Russia, Sweden                                  | RASGEF1A, RET, CSGALNACT2                                                                                                                                                                           |
| 3          | 28.5          | 2                  | England, Spain                                                                                                             | PPP1CB, CALM2, TTC7A, MCFD2                                                                                                                                                                         |
| 1A         | 70.5          | 2                  | Czech Republic, Russia                                                                                                     | CDKN1B                                                                                                                                                                                              |
| 4A         | 12            | 2                  | England, Scotland                                                                                                          | COL4A5                                                                                                                                                                                              |
| 6          | 8             | 2                  | Finland, Scotland                                                                                                          | SLC18A3, RGR, LRI1, LRI2, CDHR1, GHITM                                                                                                                                                              |
| 3          | 28            | 1                  | Spain                                                                                                                      | MRPL33, RBKS, BRE, FOSL2                                                                                                                                                                            |
| 1A         | 48.5          | 1                  | Finland                                                                                                                    | CBX6, CBX7, DNAL4, SUN2, NPTXR, JOSD1, TOMM22, KDELR3, DMC1, GTPBP1, DDX17, CBY1<br>KCNJ4, THEM184B, CSNK1E, PLA2G6, MAFF, BAIAP2L2, SLC16A8, PICK1, SOX10, MICALL1<br>EIF3L, ANKRDS4, GCAT, POLR2F |
| 6          | 7.5           | 1                  | Scotland                                                                                                                   | BMPRI1A, SNGC, MMRN2, GLUD1, FAM35A, GPRIN2, PARG, NCOA4, OGDHL, CHAT                                                                                                                               |
| 8          | 7.5           | 1                  | Vlieland                                                                                                                   | -                                                                                                                                                                                                   |
| 8          | 8             | 1                  | Belgium                                                                                                                    | -                                                                                                                                                                                                   |

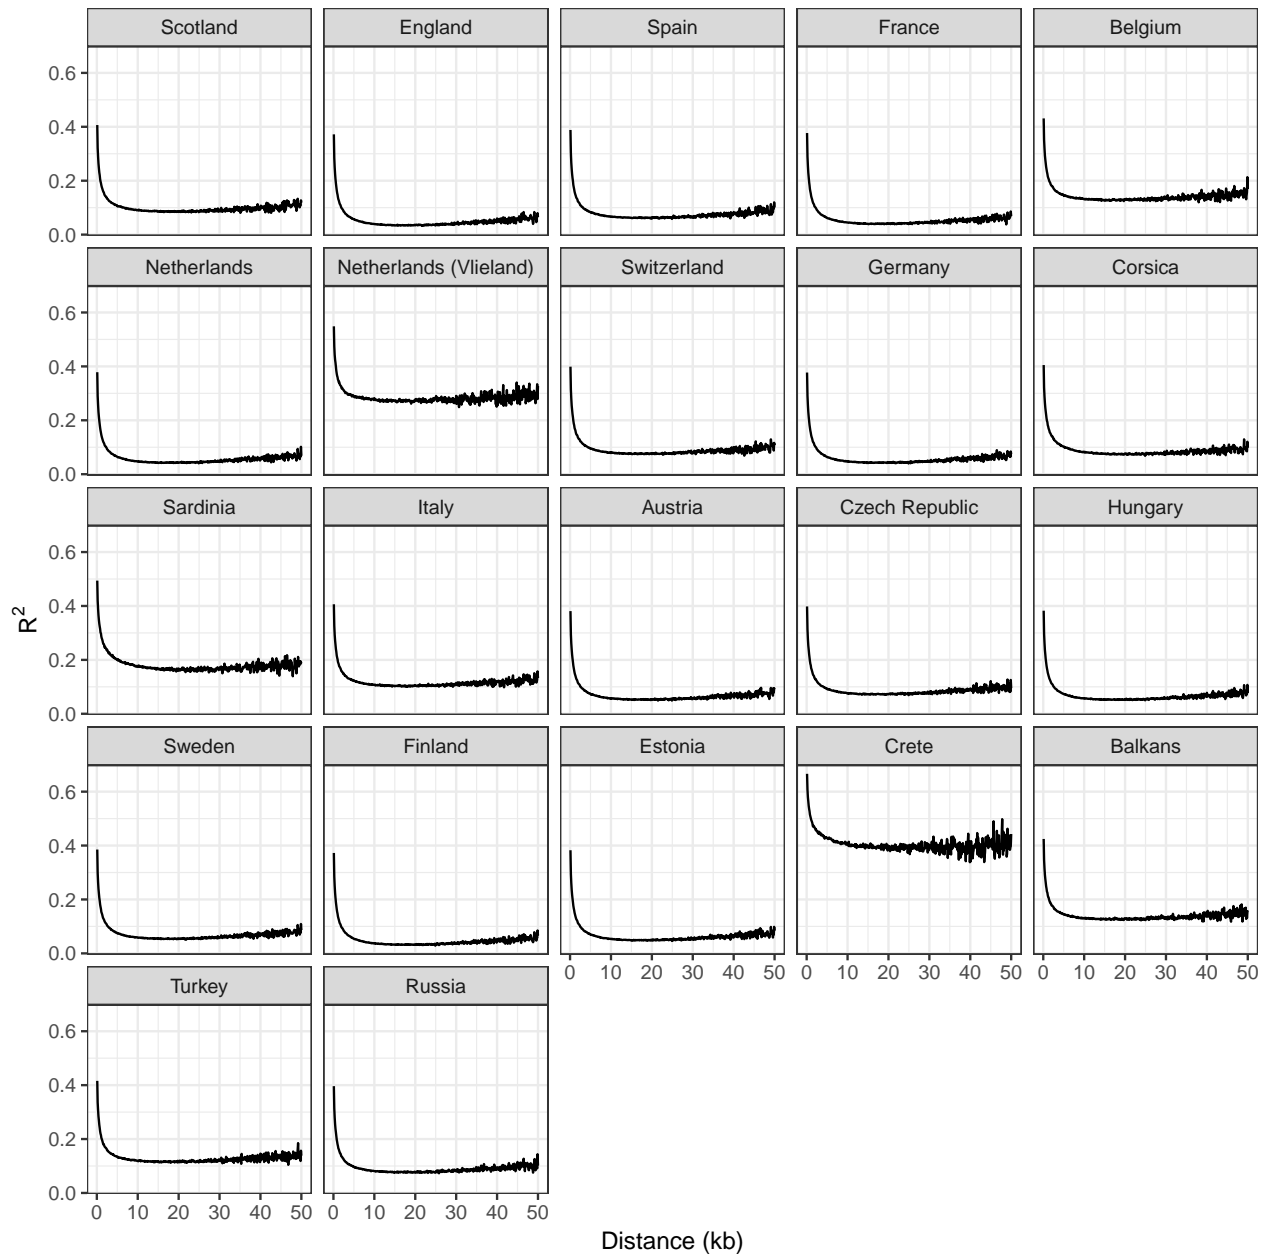

8

9 **Figure S1** Linkage disequilibrium in European great tit populations. Lines are means of  $R^2$  values for all  
 10 pairs of markers within 100bp distance bins.

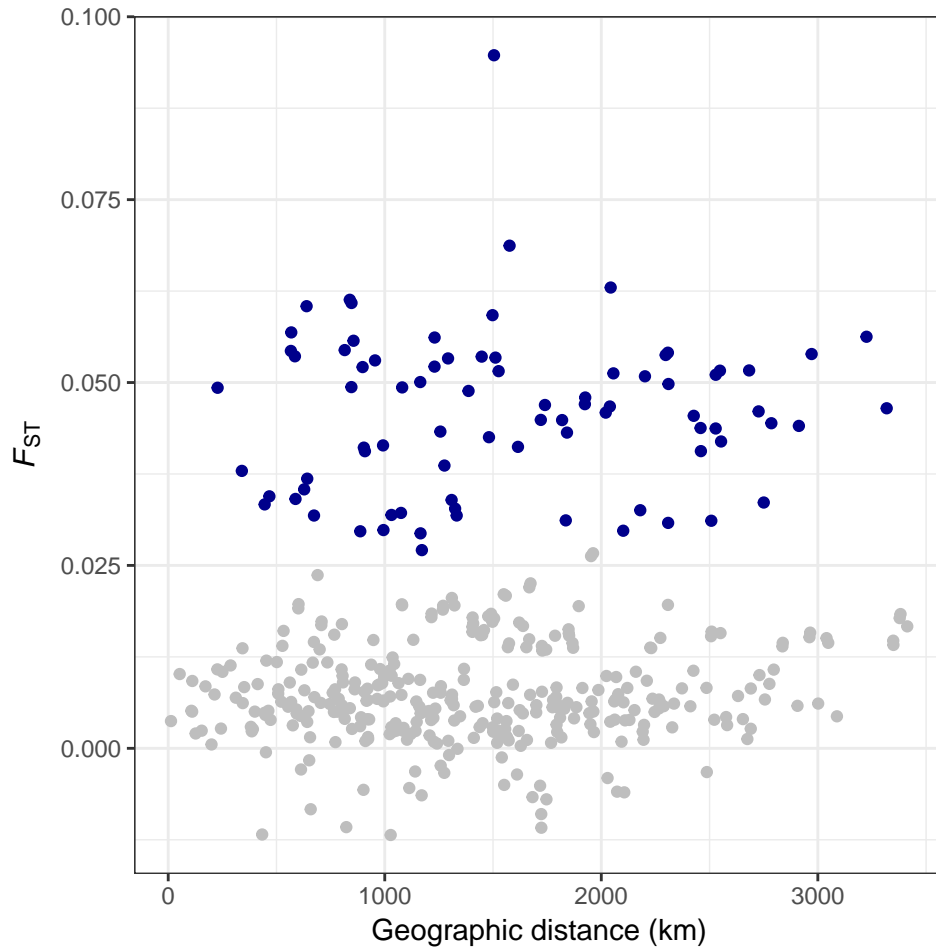

11

12 **Figure S2** Pairwise  $F_{ST}$  in relation to geographic distance among European great tit populations. Pairwise  
13 comparisons involving the island populations of Corsica, Sardinia and Crete are coloured in dark blue.

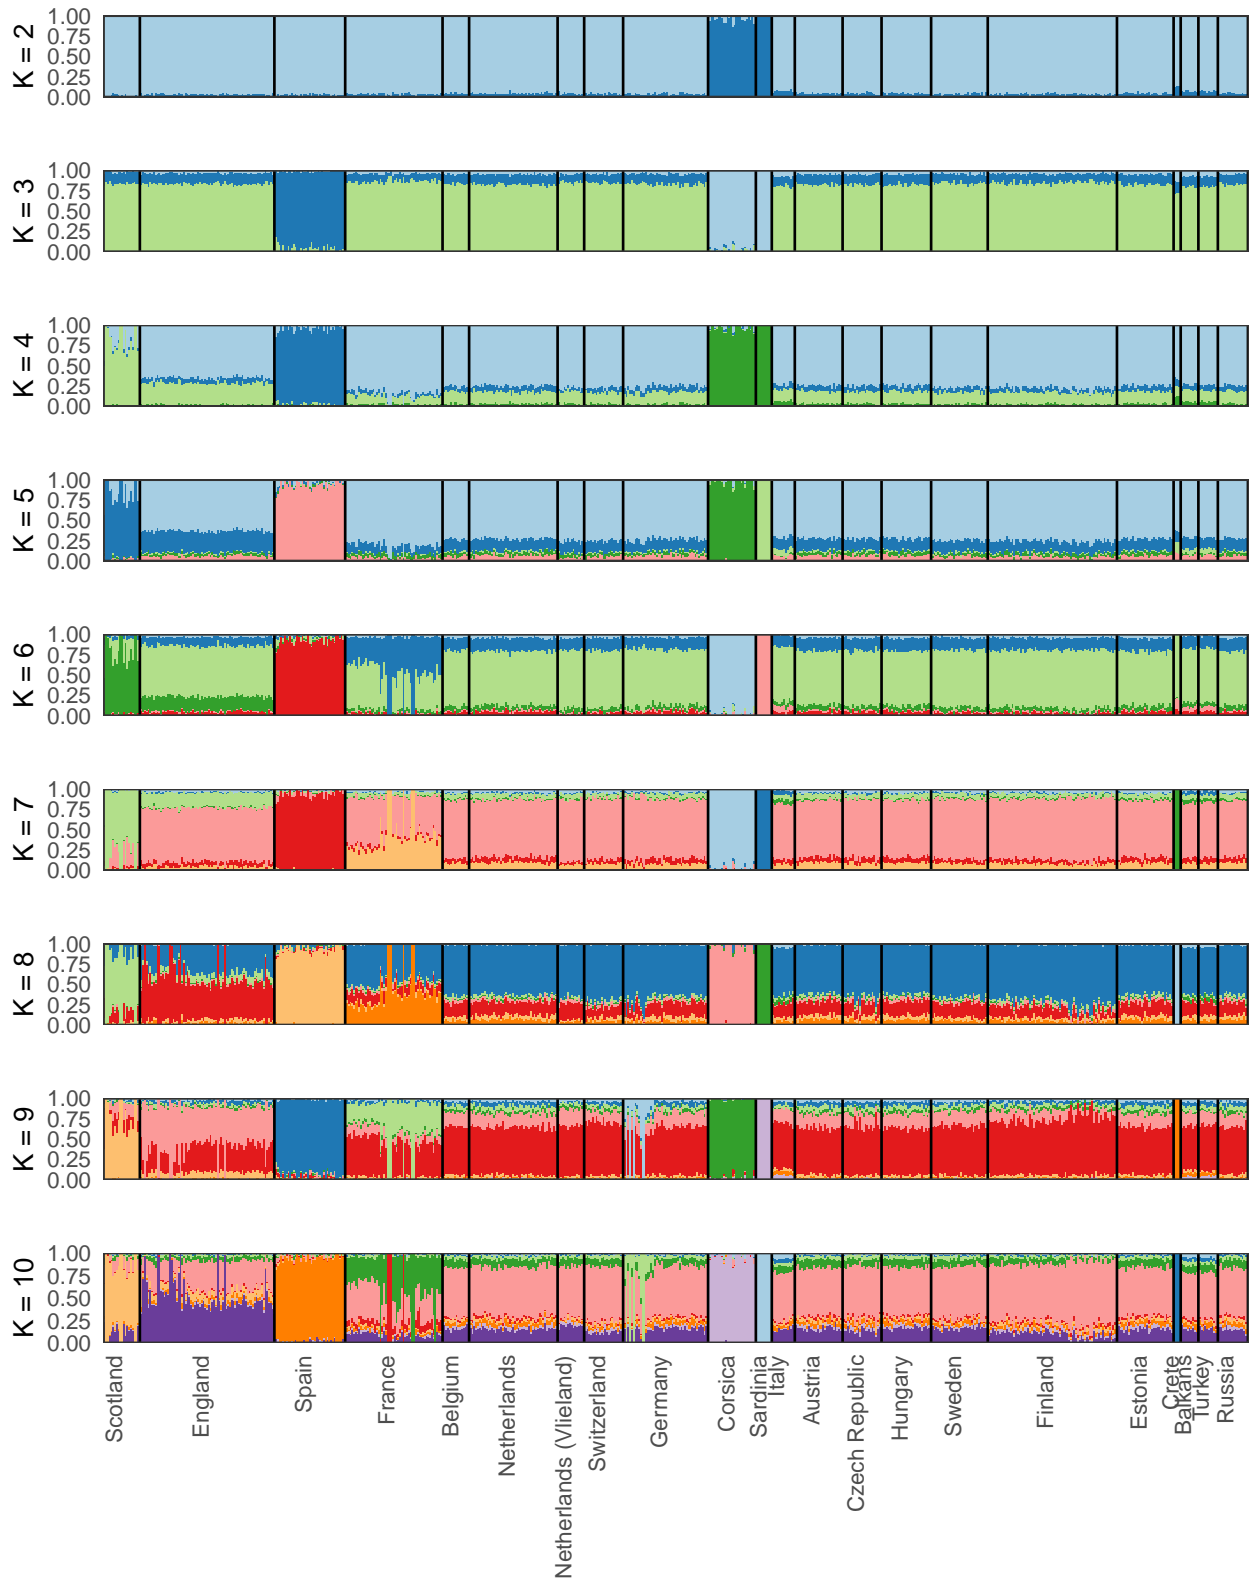

14

15 **Figure S3** Admixture analyses at  $K = 2$  to 10 in European great tit populations.

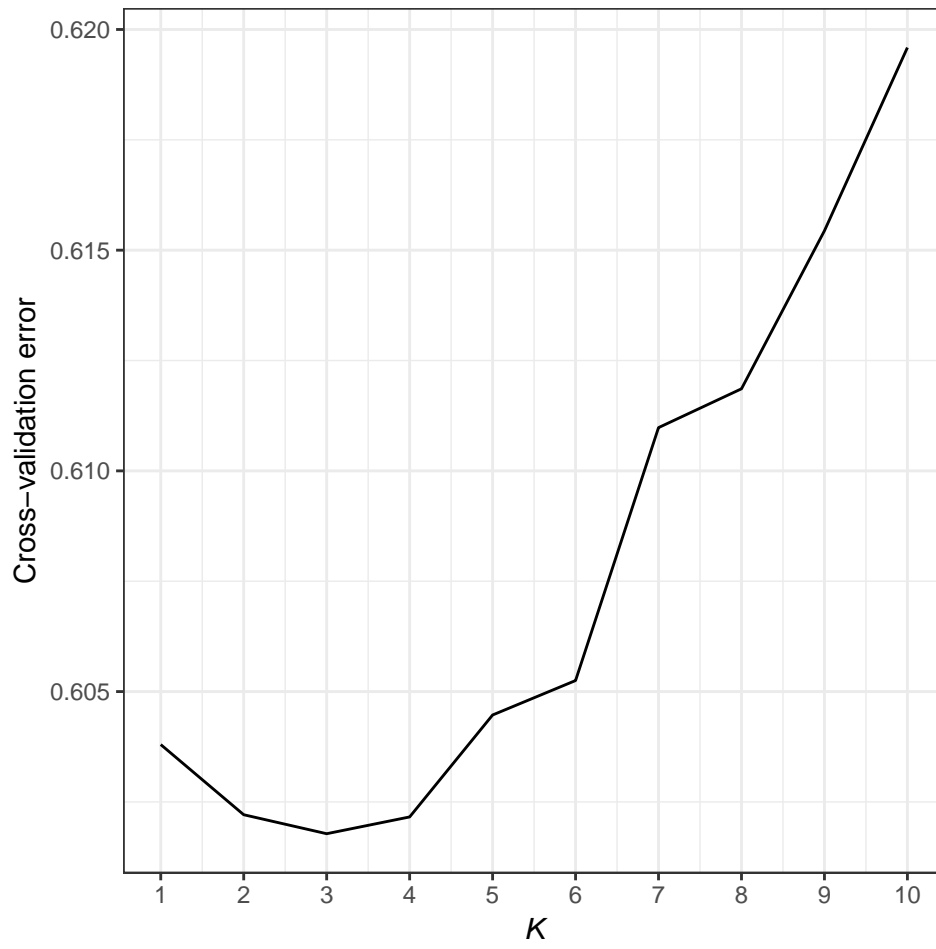

16

17 **Figure S4** Cross-validation error from Admixture analyses at  $K = 1$  to 10.

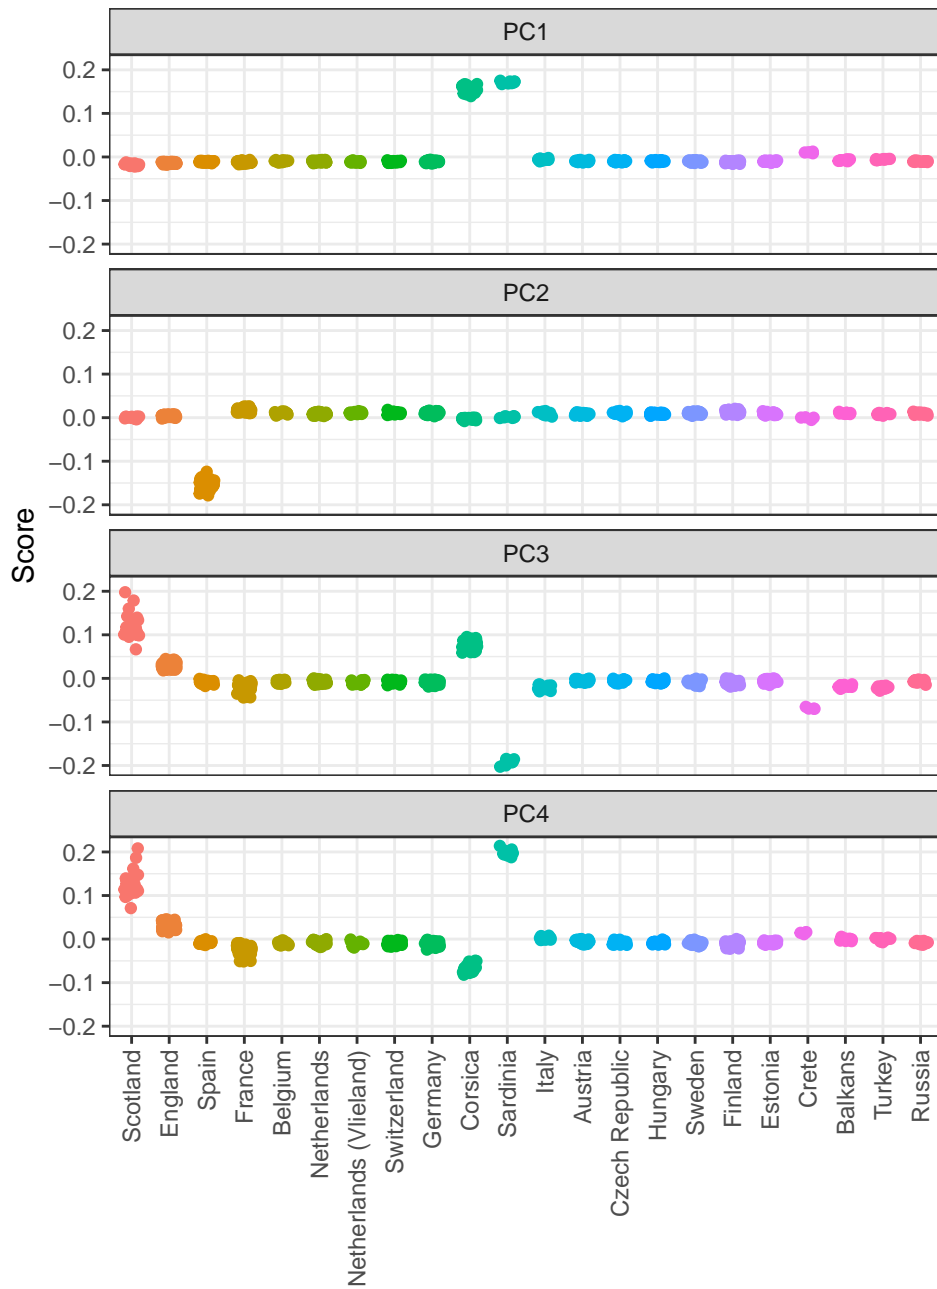

18

19 **Figure S5** Results from PCA analysis of European great tit populations.

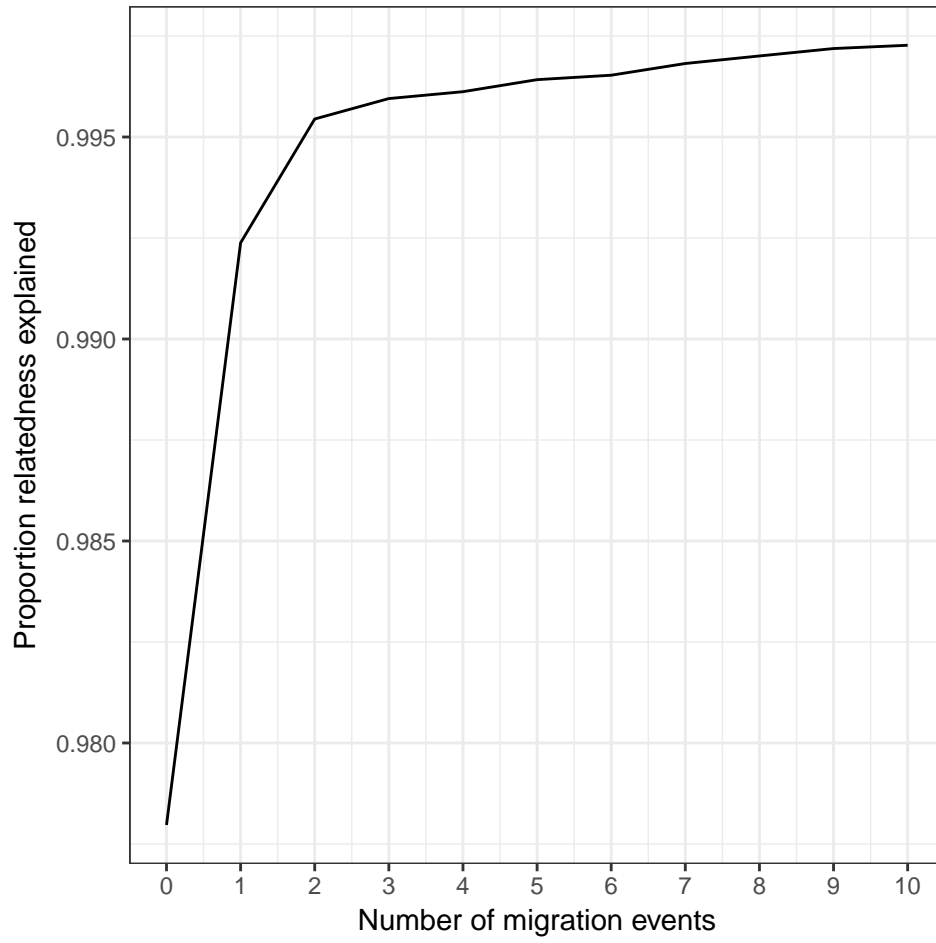

20

21 **Figure S6** Proportion of relatedness explained among populations in relation to the number of migration  
22 events allowed in TreeMix analyses.



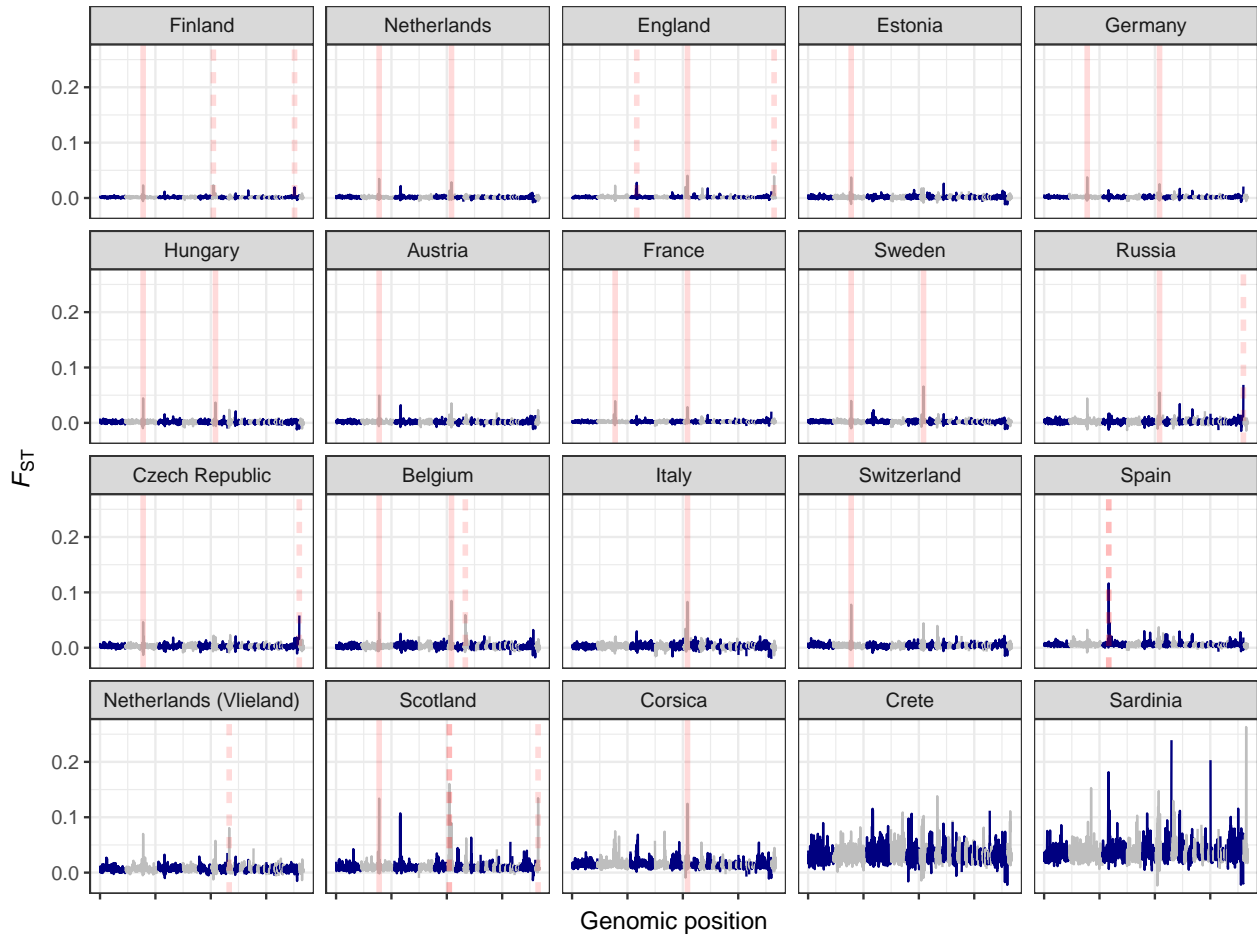

23

24 **Figure S7** Landscapes of genomic differentiation in European great tit populations.  $F_{ST}$  across the genome  
 25 is averaged in 500kb windows, with each panel displaying a pairwise comparison with the proposed refugial  
 26 population in Turkey. Red lines represent  $F_{ST}$  outliers (windows with mean  $zF_{ST} > 10$ ) shared across more  
 27 than two comparisons (solid red lines), or unique to one or two comparisons (dashed red lines).

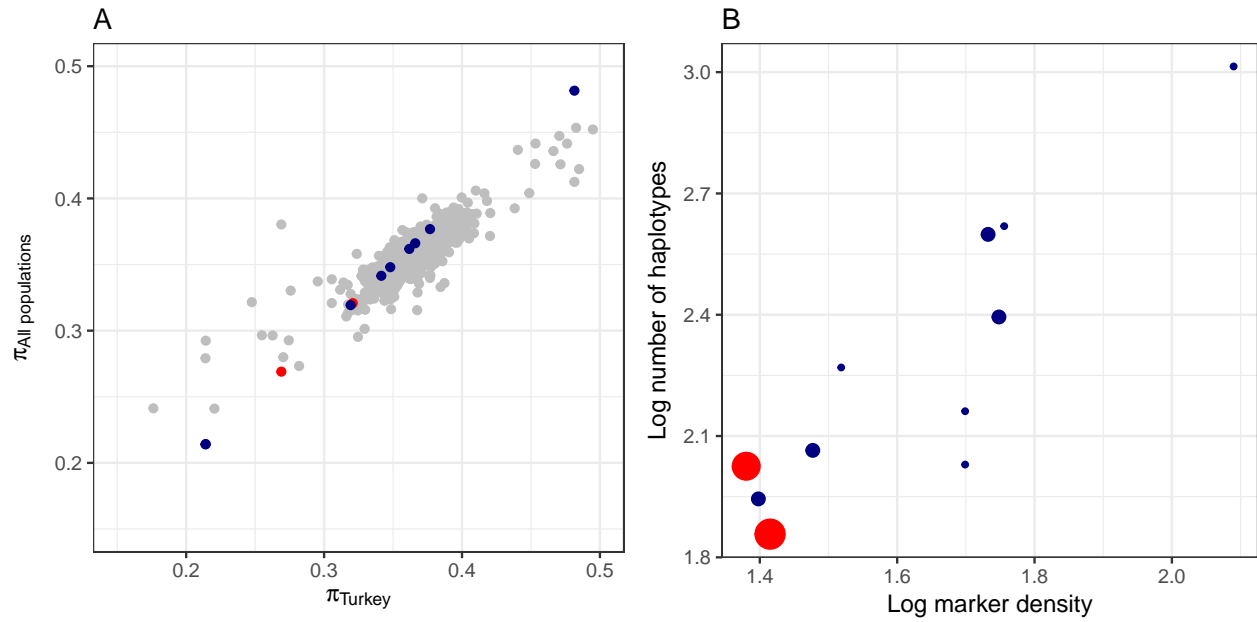

28

29 **Figure S8** Genetic diversity in  $F_{ST}$  outlier regions in European great tit populations. Each point is an  
 30 outlier window, with point size scaled by the number of populations the outlier was found in - “shared”  
 31 haplotypes are coloured red and “unique” haplotypes dark blue (see main text for details). In **A**, Nucleotide  
 32 diversity for each window is calculated for the proposed refugial population in Turkey, and plotted against  
 33 the mean for all other populations. In **B**, SNP marker density is plotted against haplotype richness for each  
 34 region.

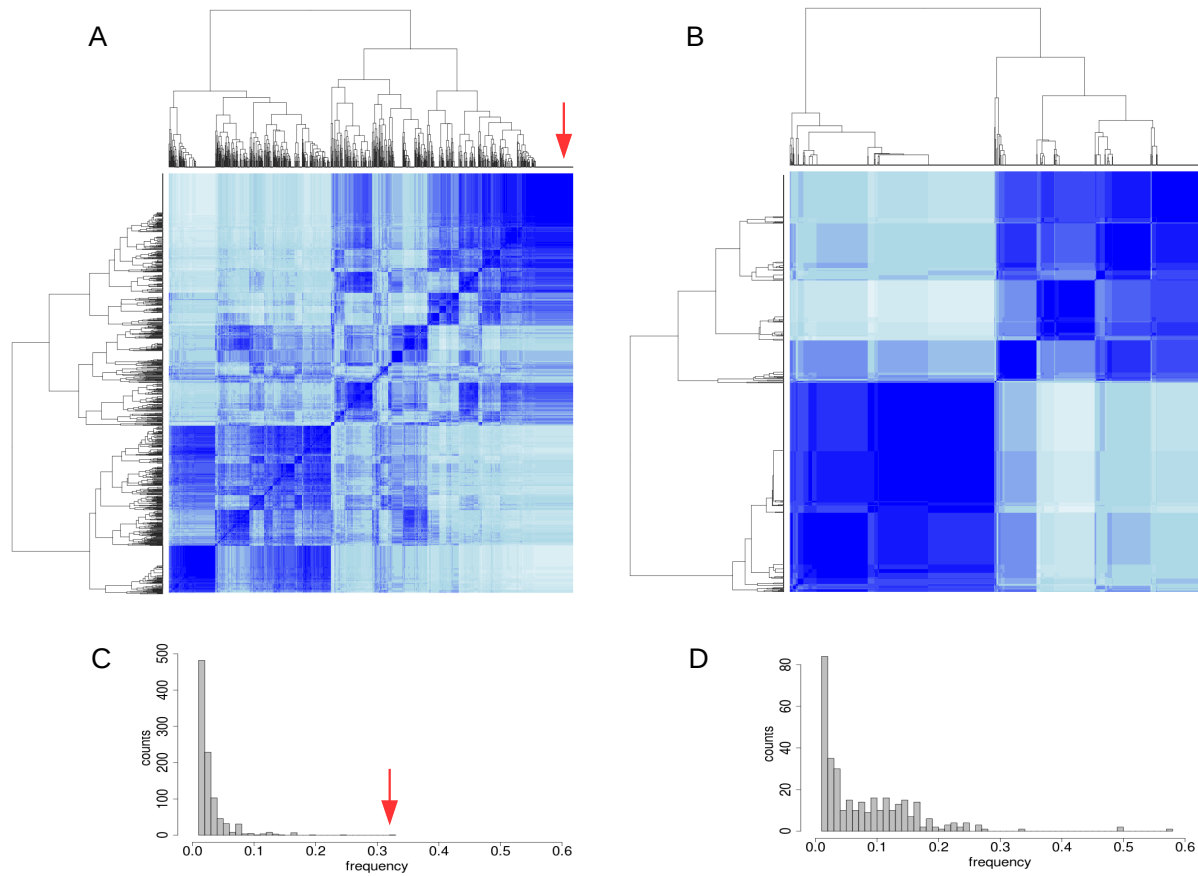

35

36 **Figure S9** Haplotype structure underlying regions of high differentiation. **A** IBS clustering of all European  
 37 haplotypes in the region containing a signal of high differentiation with Turkey specific to the Oulu population.  
 38 The red arrow indicates the haplotype at highest frequency in Finland. Colour indicates IBS similarity  
 39 (range 0: white - 1: dark blue). **B** IBS clustering of all European haplotypes in the region on chromosome 2  
 40 containing a signal of high differentiation with Turkey in multiple populations. **C** Frequency of all identified  
 41 haplotypes within each population. The red arrow indicates the high-frequency haplotype within Finland. **D**  
 42 Frequency of all identified haplotypes spanning the region on chromosome 2 within each population.
